# Supplementary material for: Insights into the levulinate-based ionic liquid class: synthesis, cellulose dissolution evaluation and ecotoxicity assessment
Source: Royal Society of Chemistry journal article supplement (doi:10.1039/c9nj03239h), 2019-01-01

# Insights into the levulinate-based ionic liquid class: synthesis, cellulose dissolution evaluation and ecotoxicity assessment

Andrea Mezzetta,<sup>[a]</sup> Stefano Becherini,<sup>[a]</sup> Carlo Pretti,<sup>[b,c]</sup> Gianfranca Monni,<sup>[c]</sup> Valentina Casu,<sup>[c]</sup> Cinzia Chiappe<sup>[a]</sup> and Lorenzo Guazzelli<sup>\*[a]</sup>

## *Supporting Information*

### *Table of contents*

|                                                                                   |                      |
|-----------------------------------------------------------------------------------|----------------------|
| <sup>1</sup> H- and <sup>13</sup> C-NMR spectra of Lev ILs                        | pages <b>S2-S11</b>  |
| IR spectra of Lev ILs                                                             | pages <b>S12-S15</b> |
| Thermal gravimetric analysis (TGA) of Lev ILs                                     | pages <b>S16-S19</b> |
| Images of dissolved MCC in Lev ILs at maximum wt%                                 | pages <b>S20-S25</b> |
| Optical microscopy of dissolved MCC in Lev ILs at maximum wt%                     | pages <b>S26-S33</b> |
| IR spectra of pristine MCC and regenerated cellulose after dissolution in Lev ILs | pages <b>S34-S38</b> |
| XRD measurements of MCC and regenerated cellulose from [EMIM][Lev]                | page <b>S39</b>      |

---

[a] A. Mezzetta, S. Becherini, C. Chiappe, L. Guazzelli  
Department of Pharmacy  
University of Pisa  
Via Bonanno 6, Pisa (Italy)  
\*E-mail: [lorenzo.guazzelli@unipi.it](mailto:lorenzo.guazzelli@unipi.it)

[b] C. Pretti  
Department of Veterinary Sciences,  
University of Pisa,  
Via Livornese lato monte, San Piero a Grado (PI) 56122, Pisa,  
Italy

[c] C. Pretti, G. Monni, V. Casu  
Interuniversity Consortium of Marine Biology of Leghorn "G.  
Bacci", Livorno, 57128, Italy

Fig S1.  $^1\text{H}$  NMR of EMIMLev at 25 °C

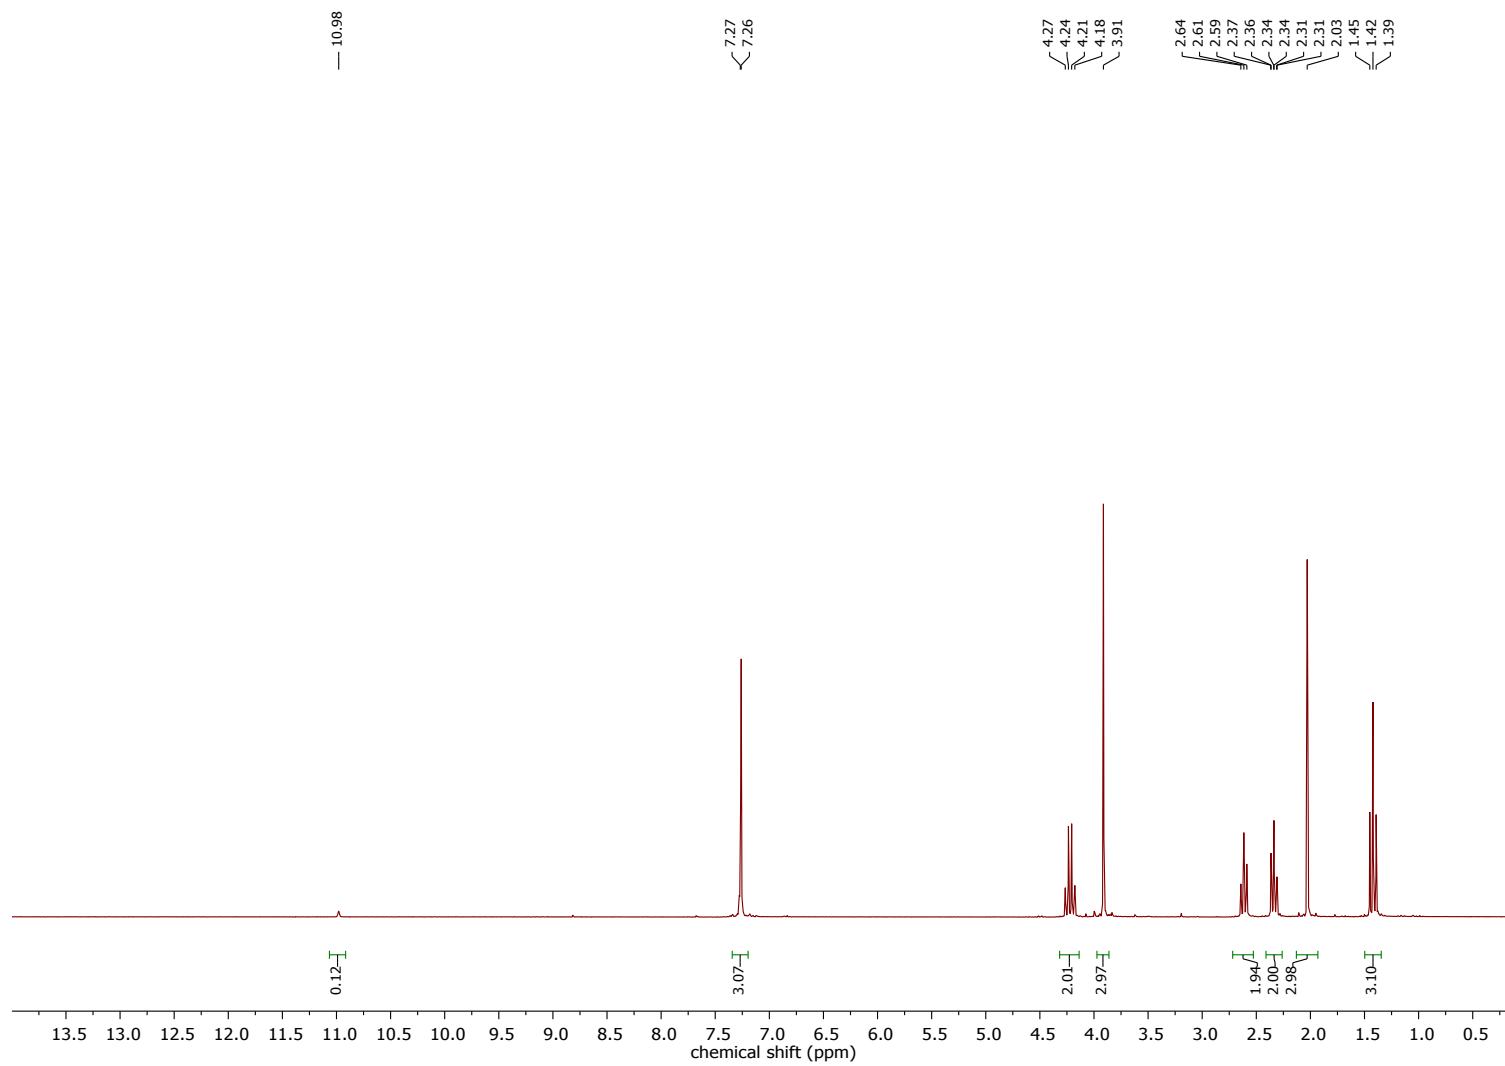

Fig S2.  $^{13}\text{C}$  NMR of EMIMLev at 25 °C

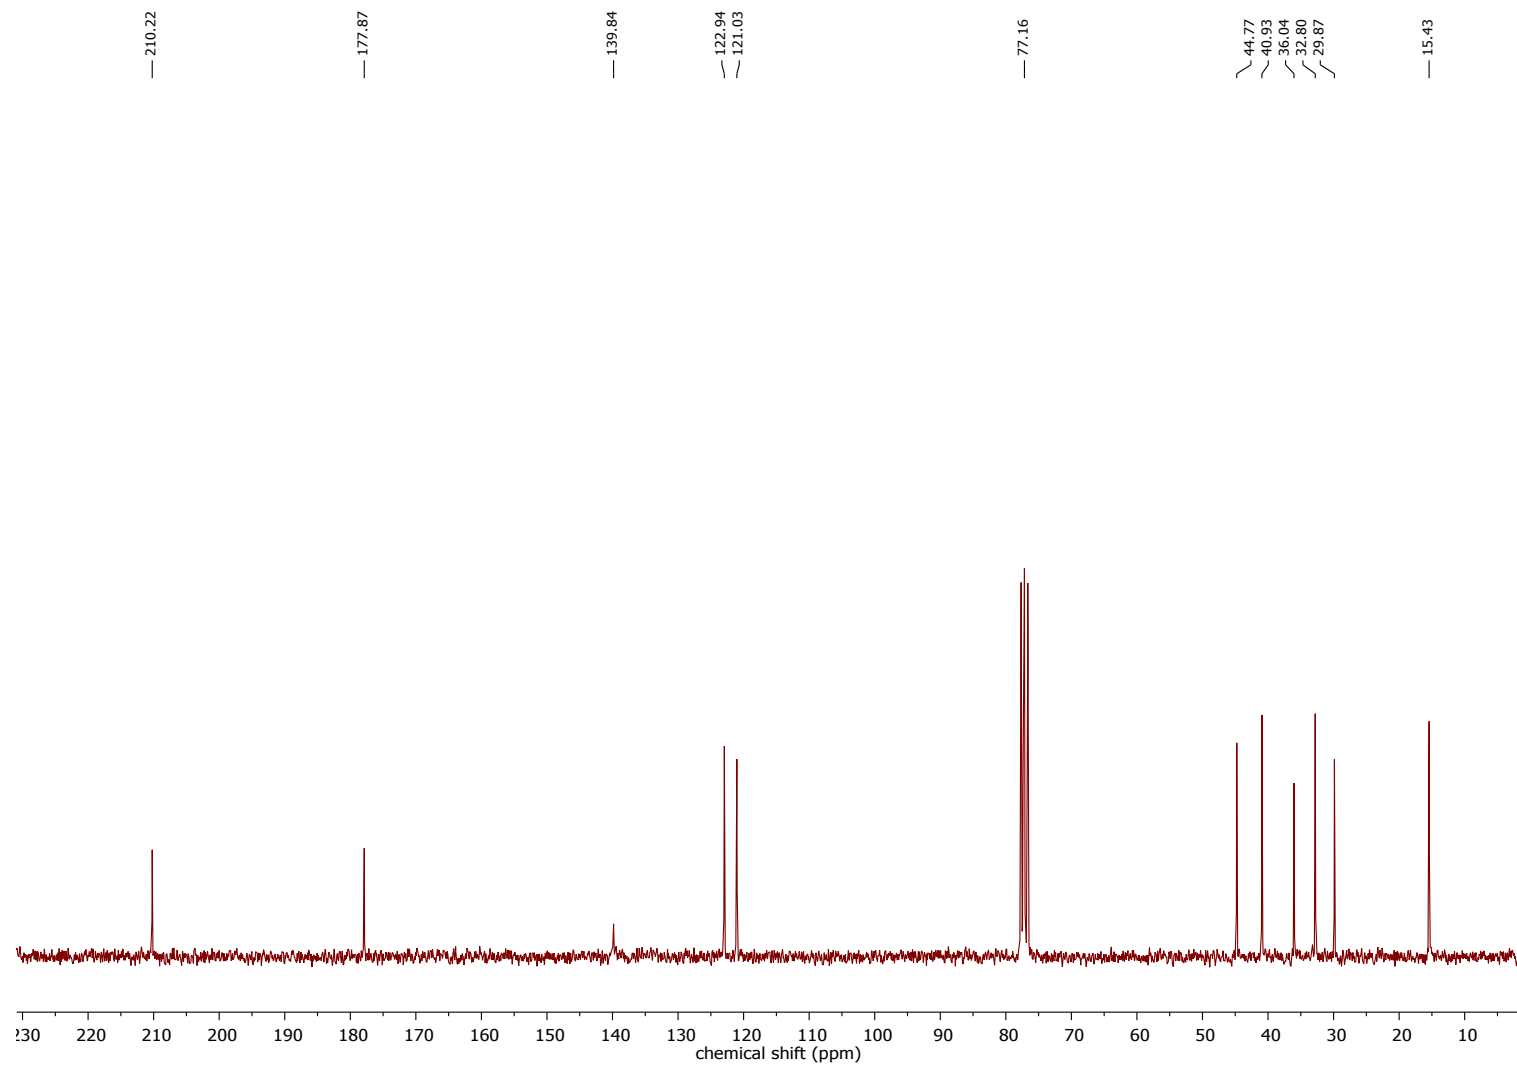

**Fig S3.**  $^1\text{H}$  NMR of **EMIMLev** (25 °C) recycled after the second cycle of dissolution of MCC at 100 °C

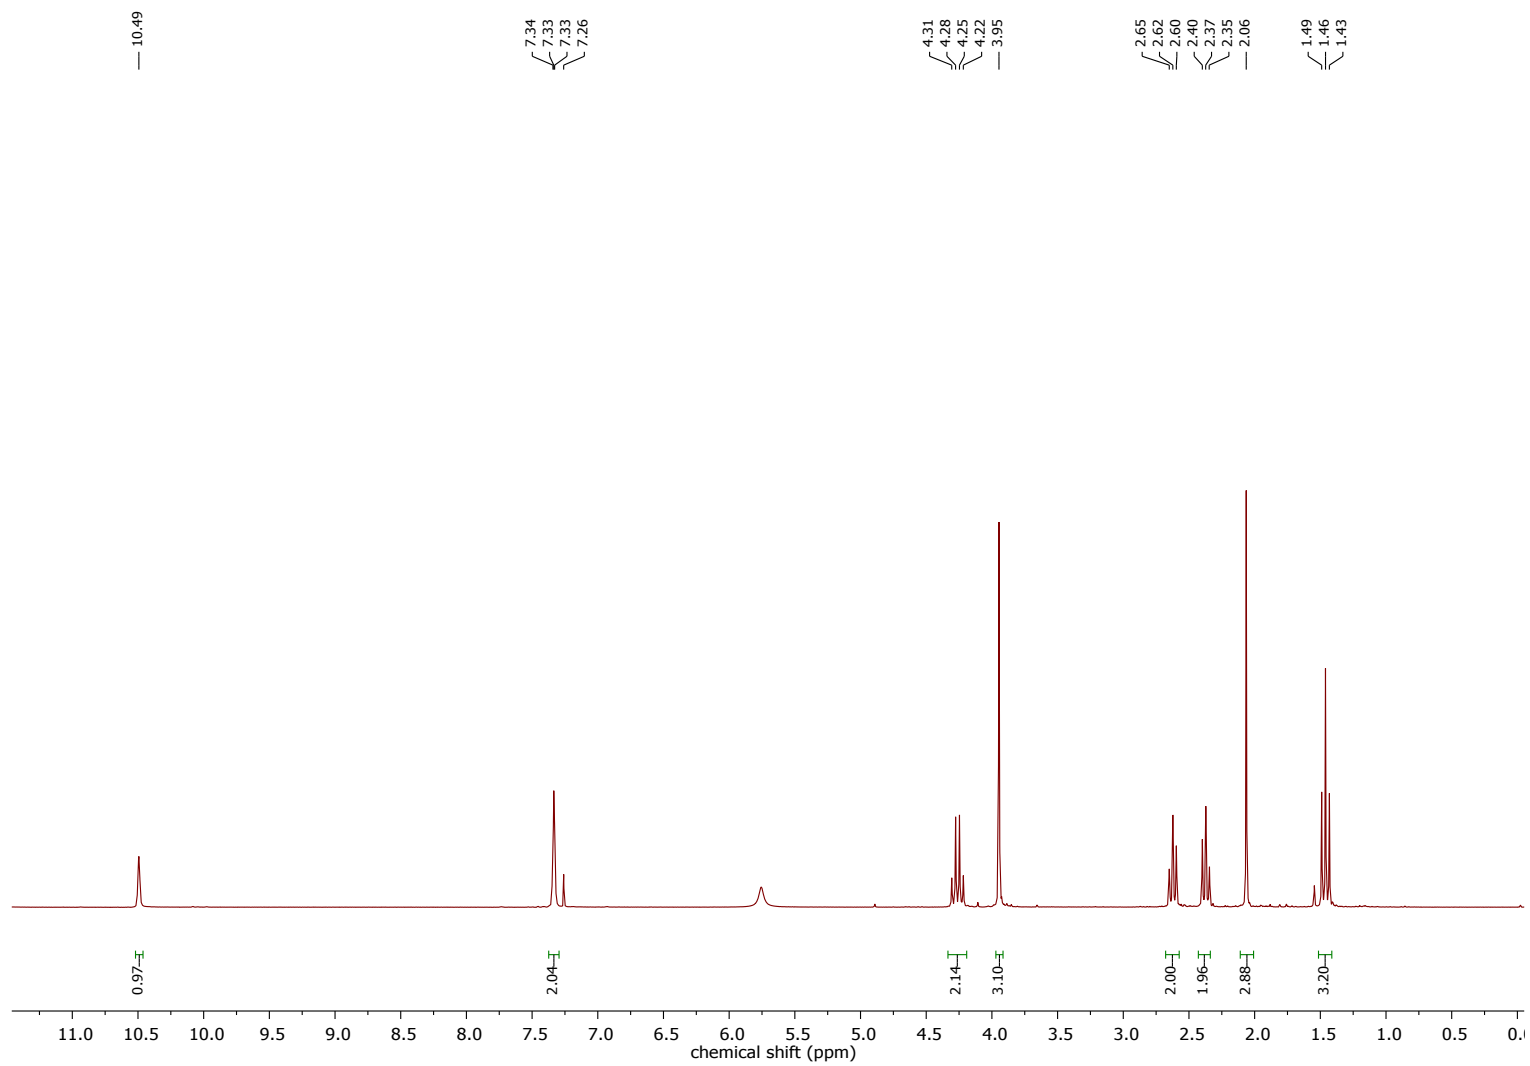

**Fig S4.**  $^1\text{H}$  NMR of **EMIMLev** (coaxial, 25 °C) after 12h at 120 °C (thermal stability test)

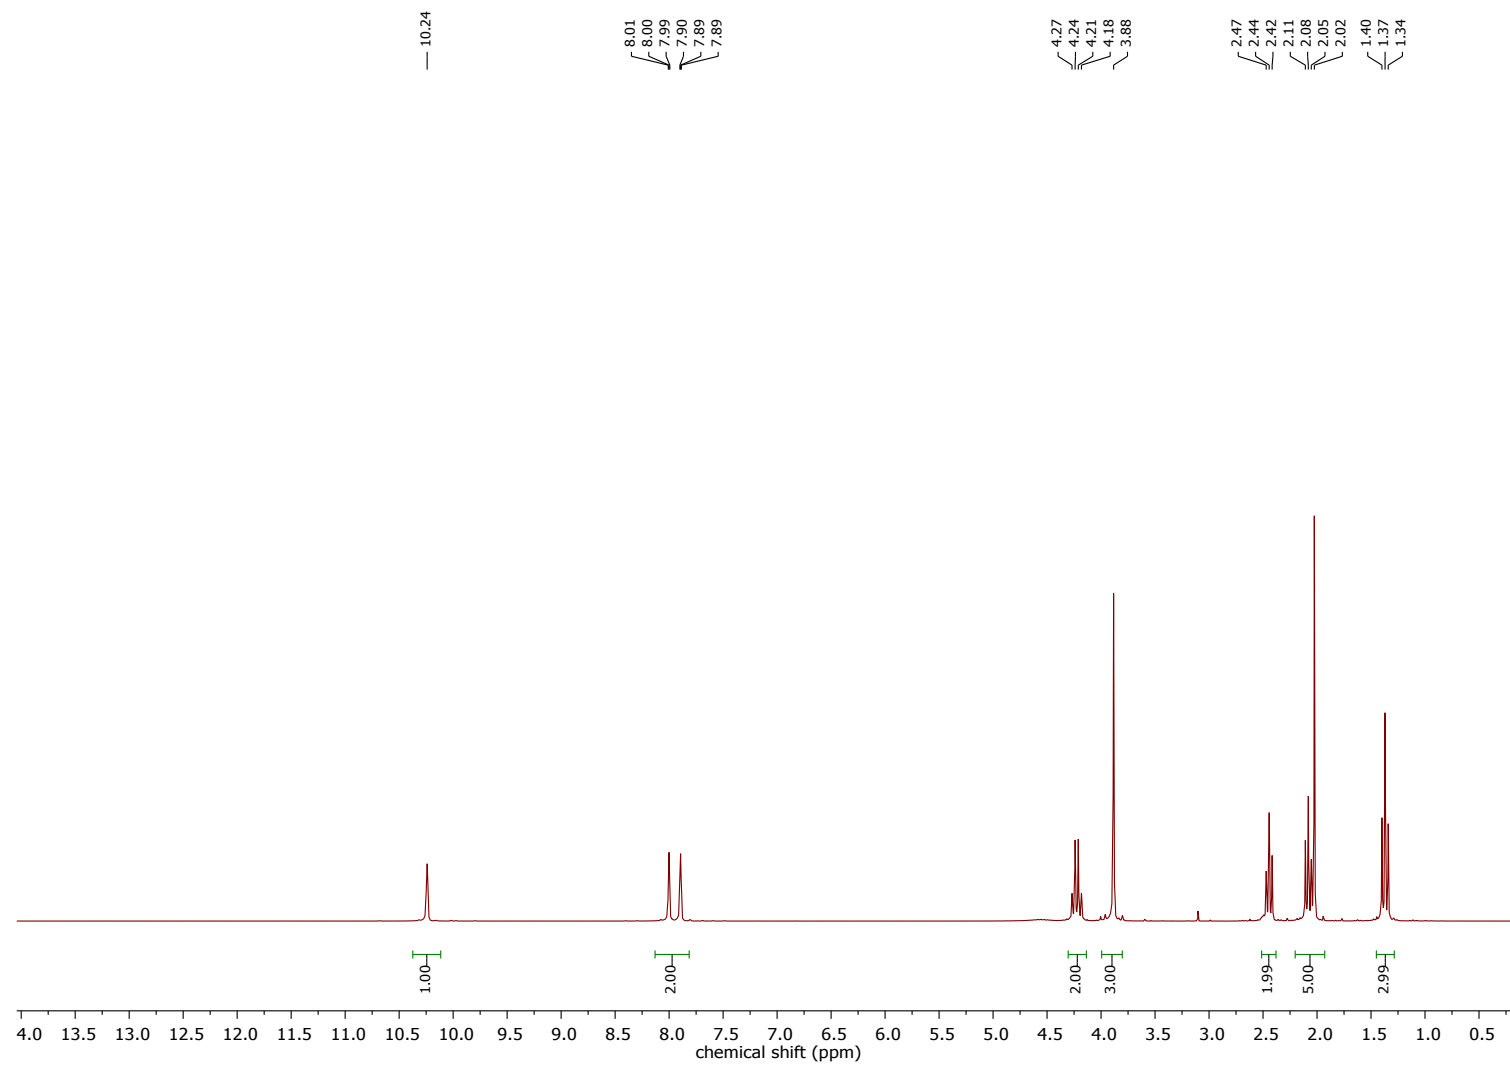

Fig S5.  $^1\text{H}$  NMR of **BMIMLev** at 25  $^\circ\text{C}$

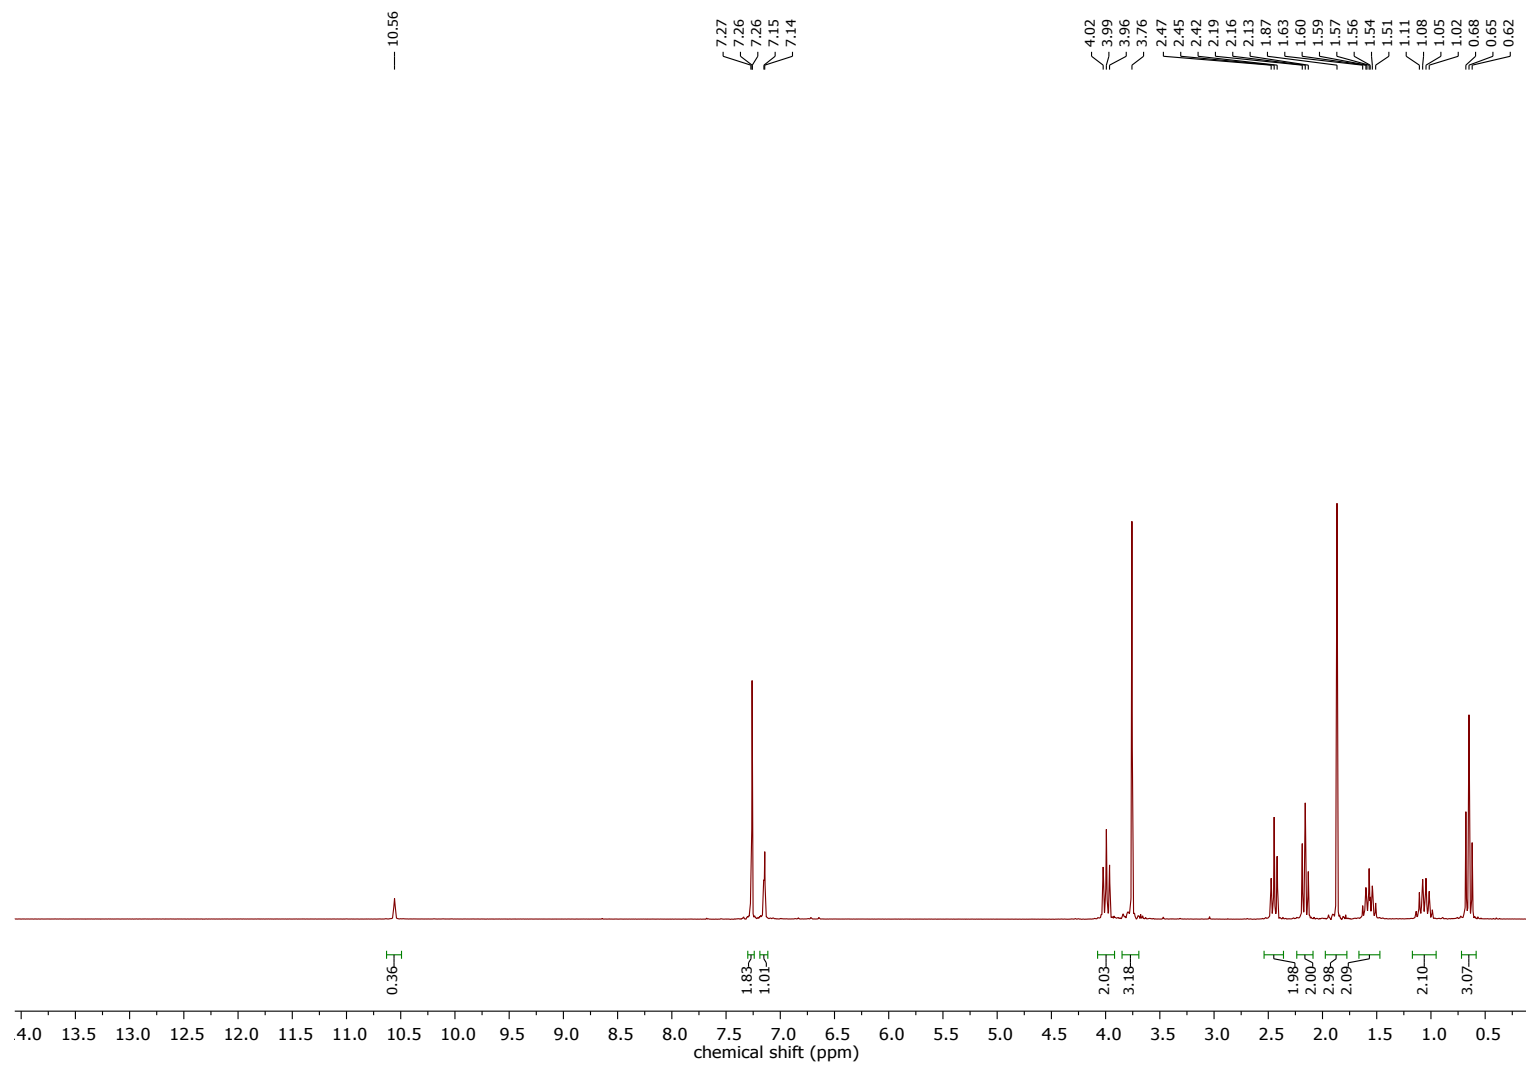

Fig S6.  $^{13}\text{C}$  NMR of BMIMLev at 25 °C

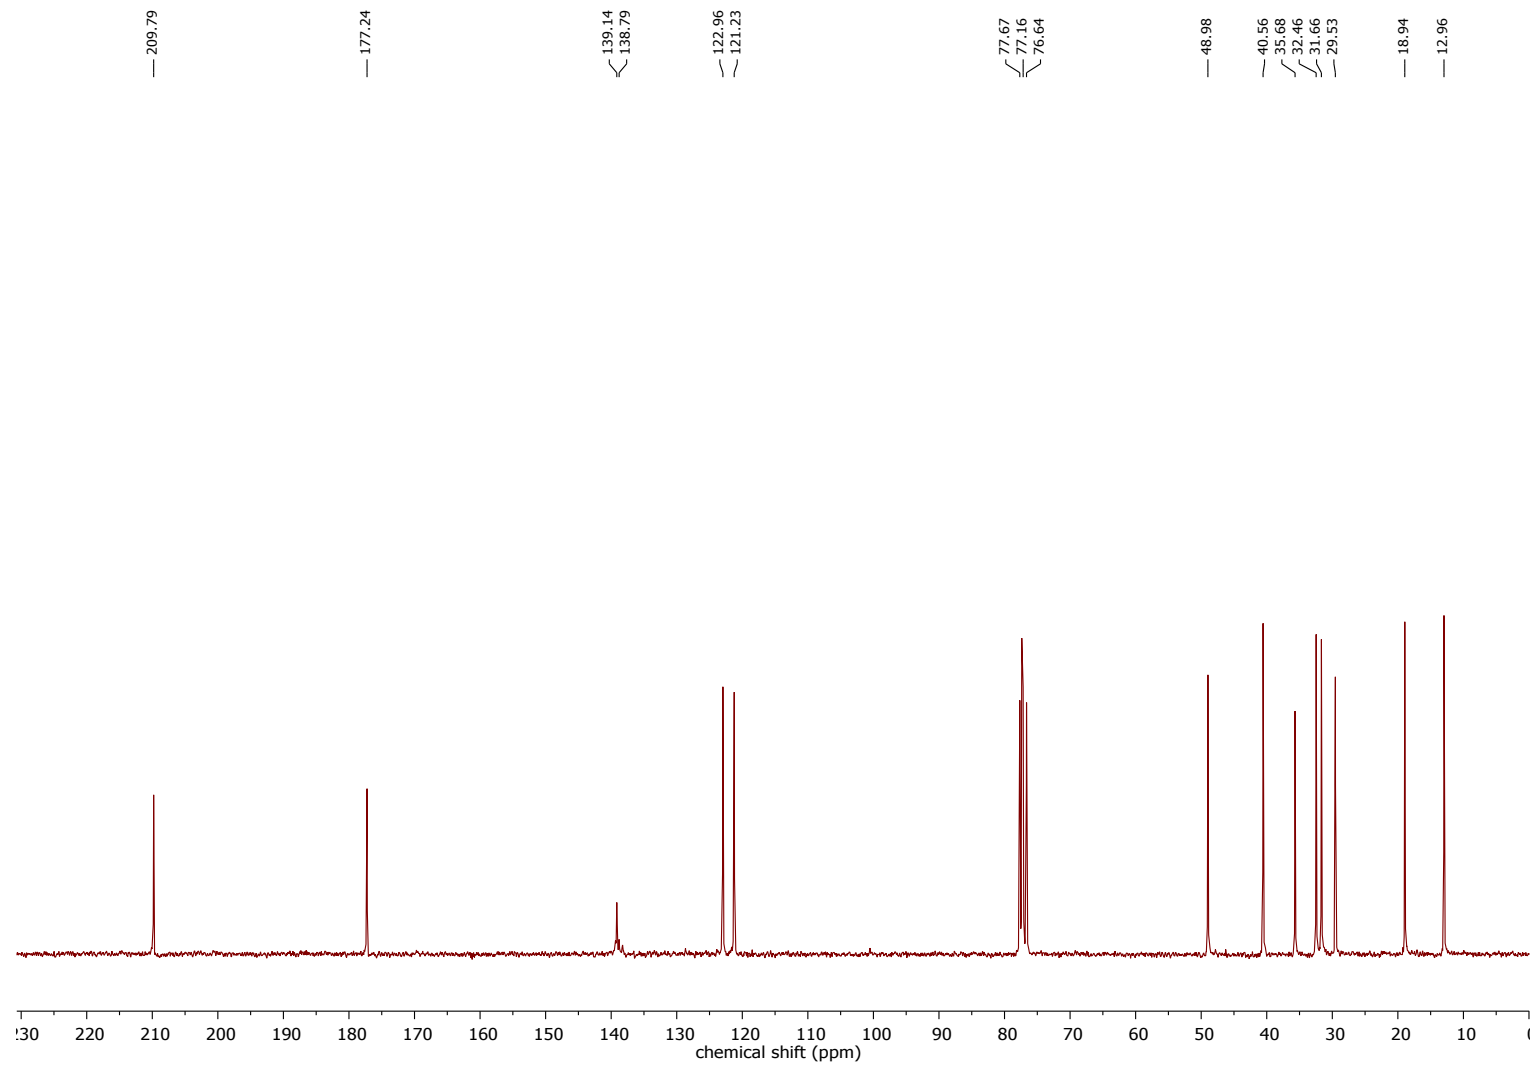

Fig S7.  $^1\text{H}$  NMR of  $\text{N}_{8881}\text{Lev}$  at 25 °C

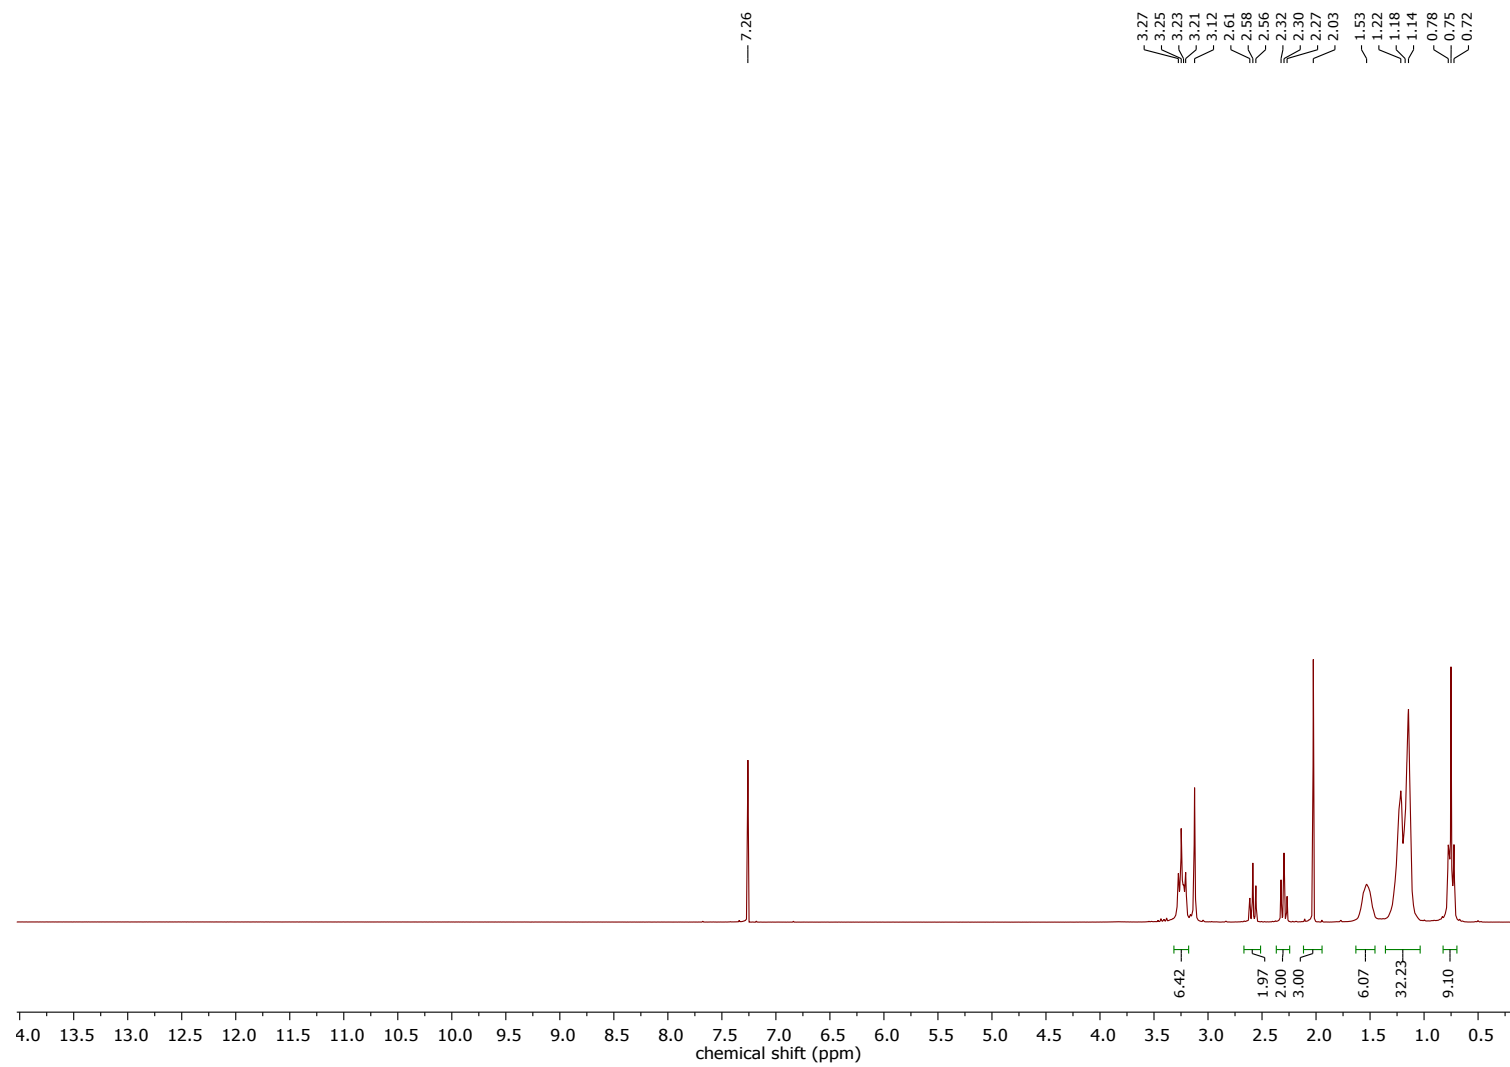



Fig S8.  $^{13}\text{C}$  NMR of  $\text{N}_{8881}\text{Lev}$  at 25 °C

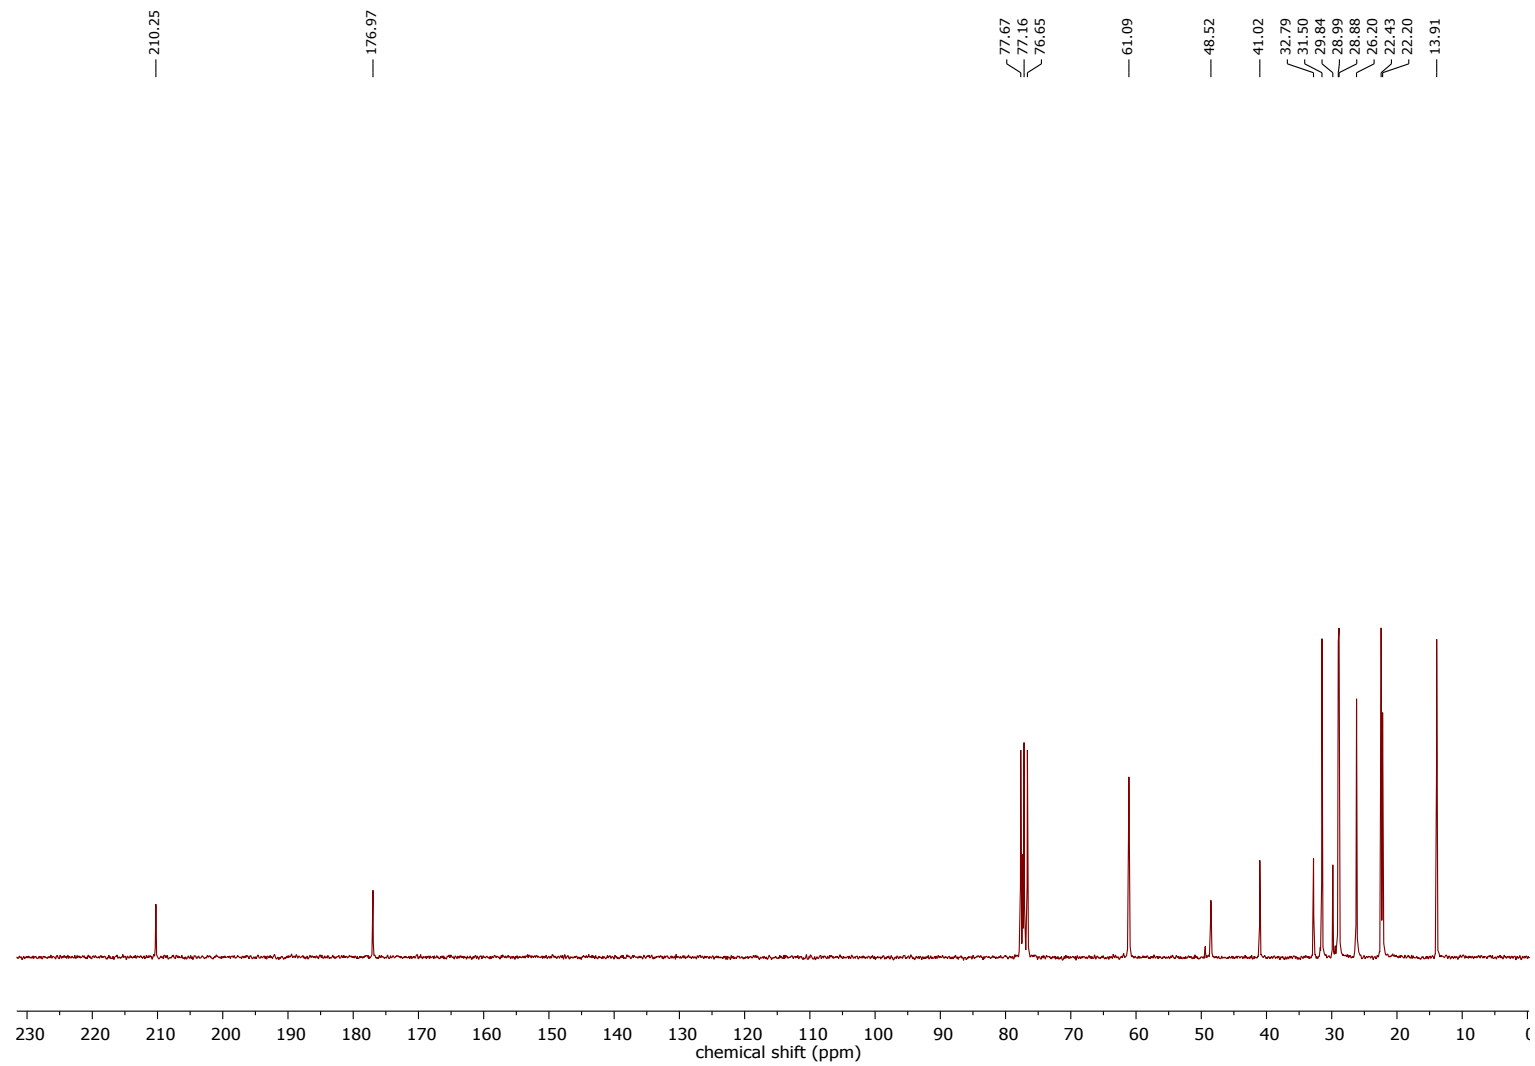

Fig S9.  $^1\text{H}$  NMR of  $\text{P}_{8881}\text{Lev}$  at 25  $^\circ\text{C}$

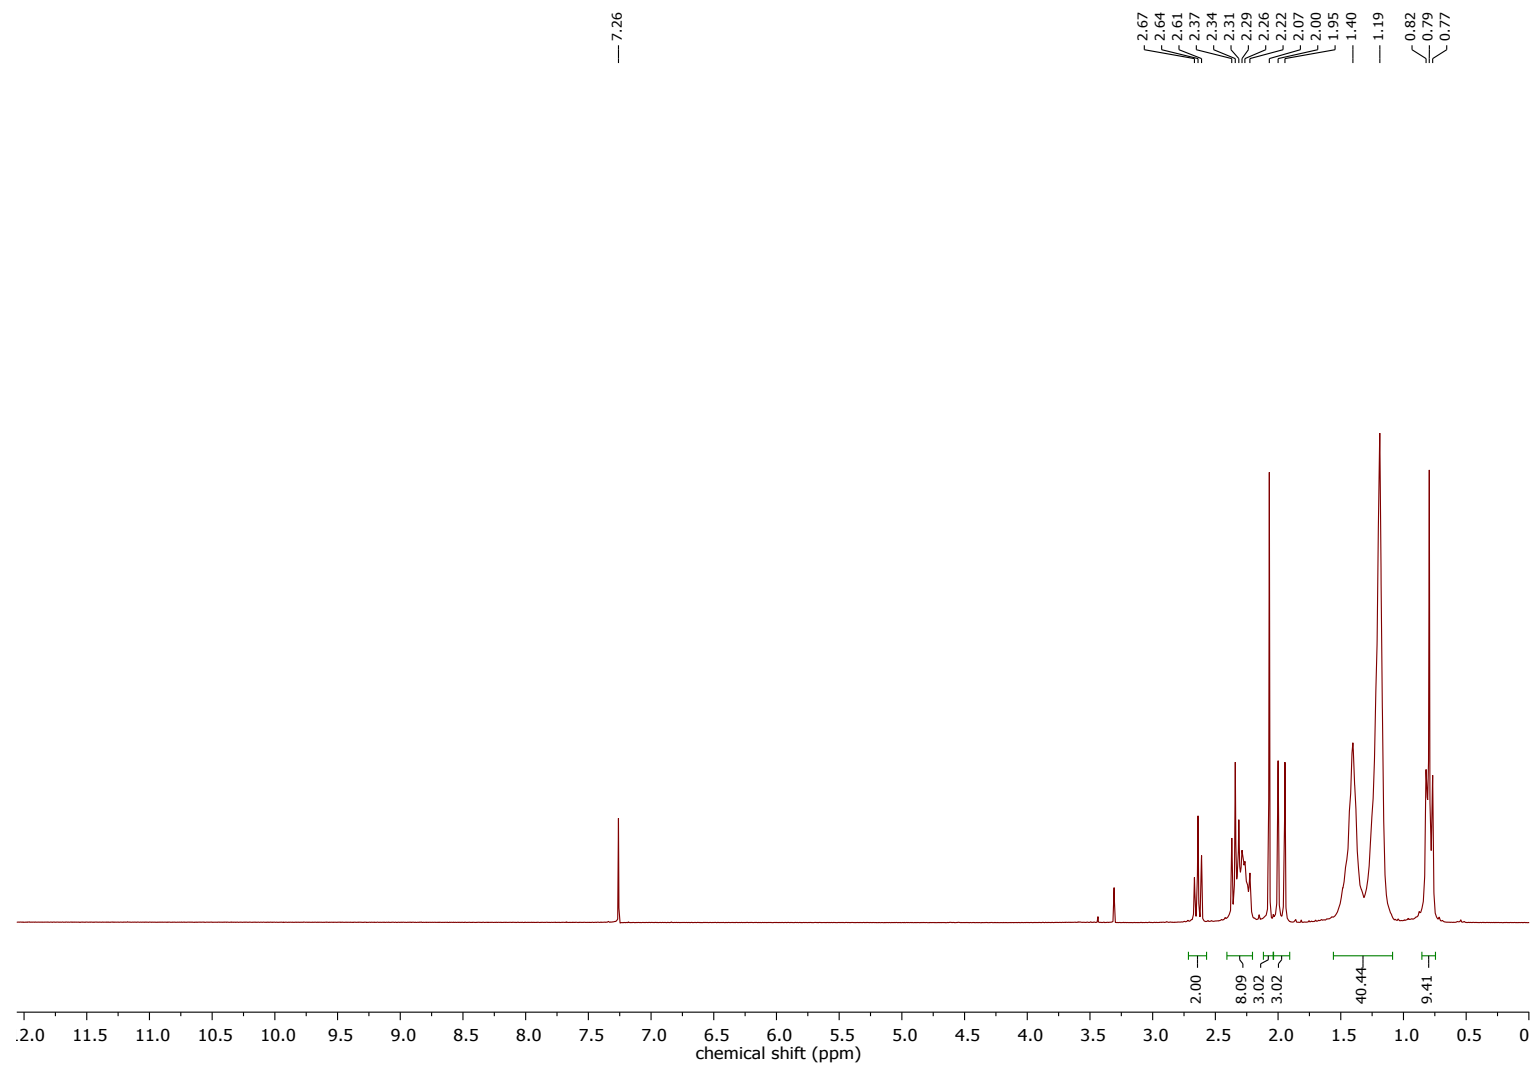

Fig S10.  $^{13}\text{C}$  NMR of  $\text{P}_{8881}\text{Lev}$  at 25 °C

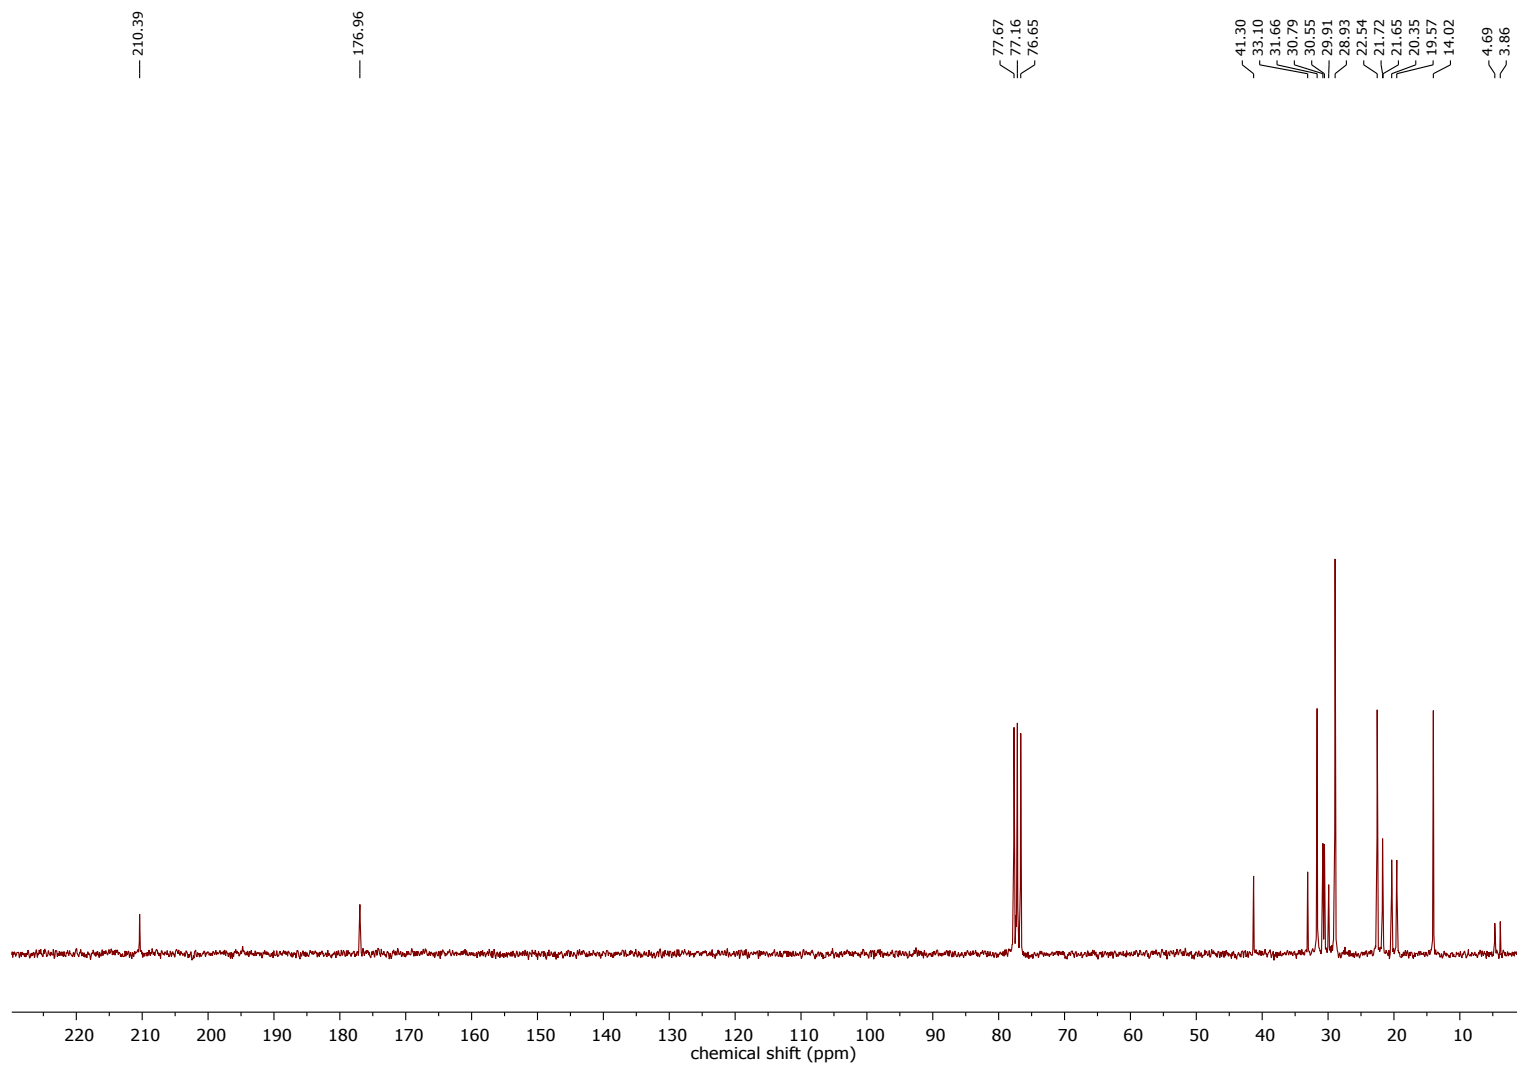

Fig S11. IR of EMIMLev at 25 °C

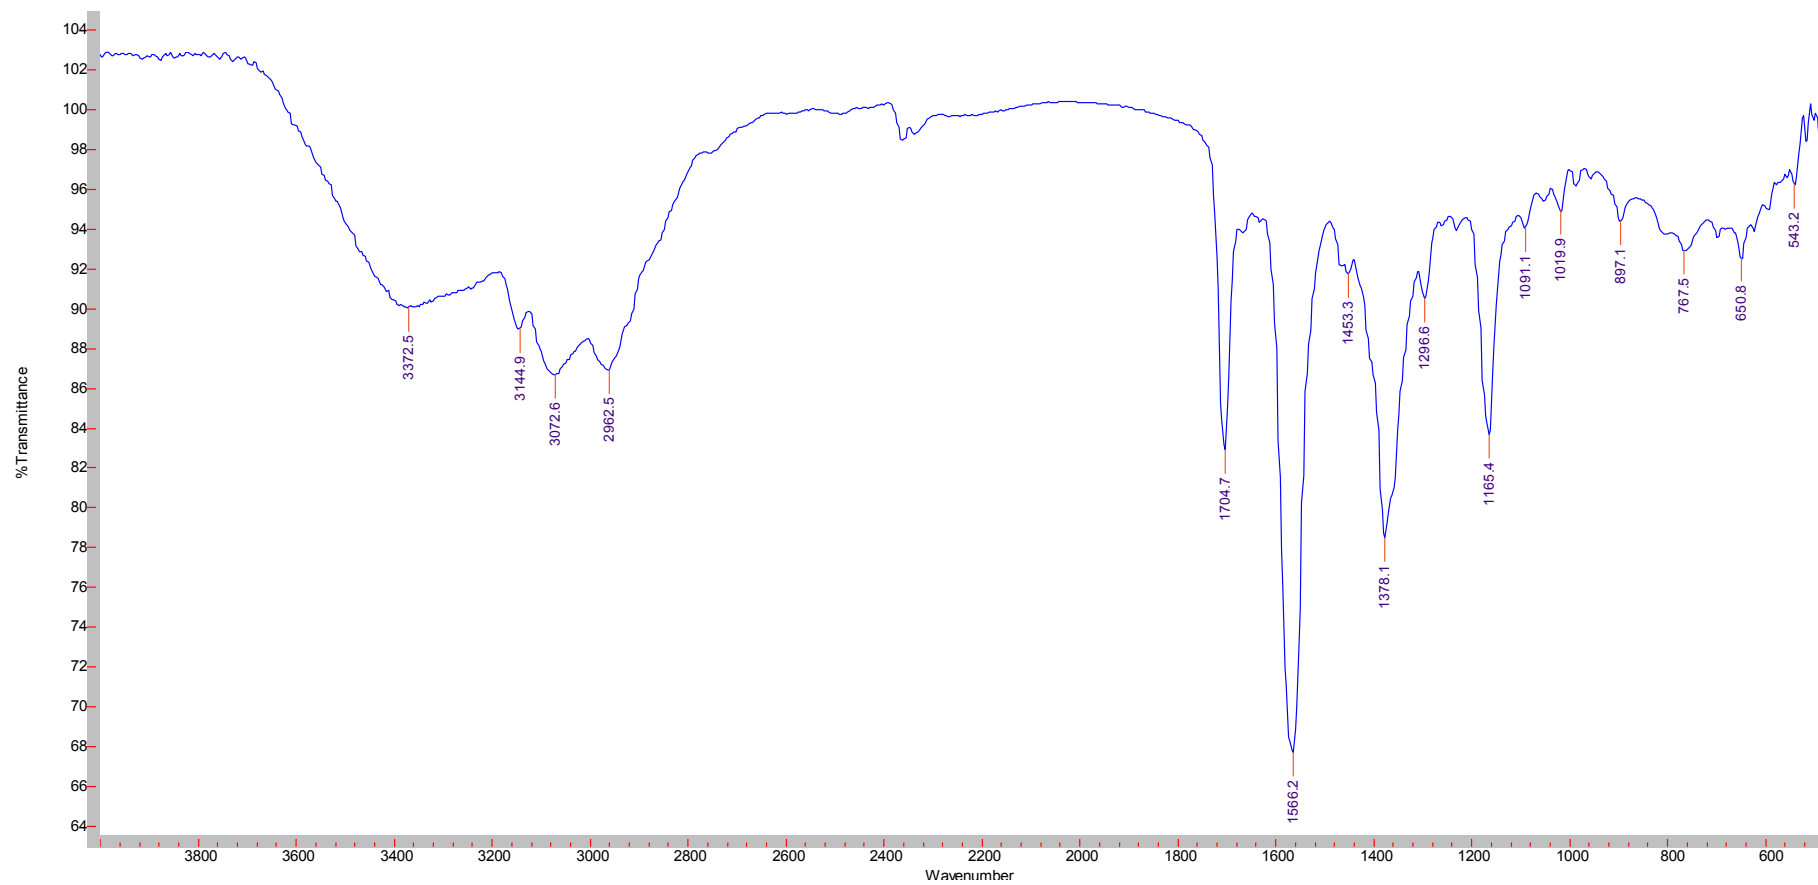

Fig S12. IR of BMIMLev at 25 °C

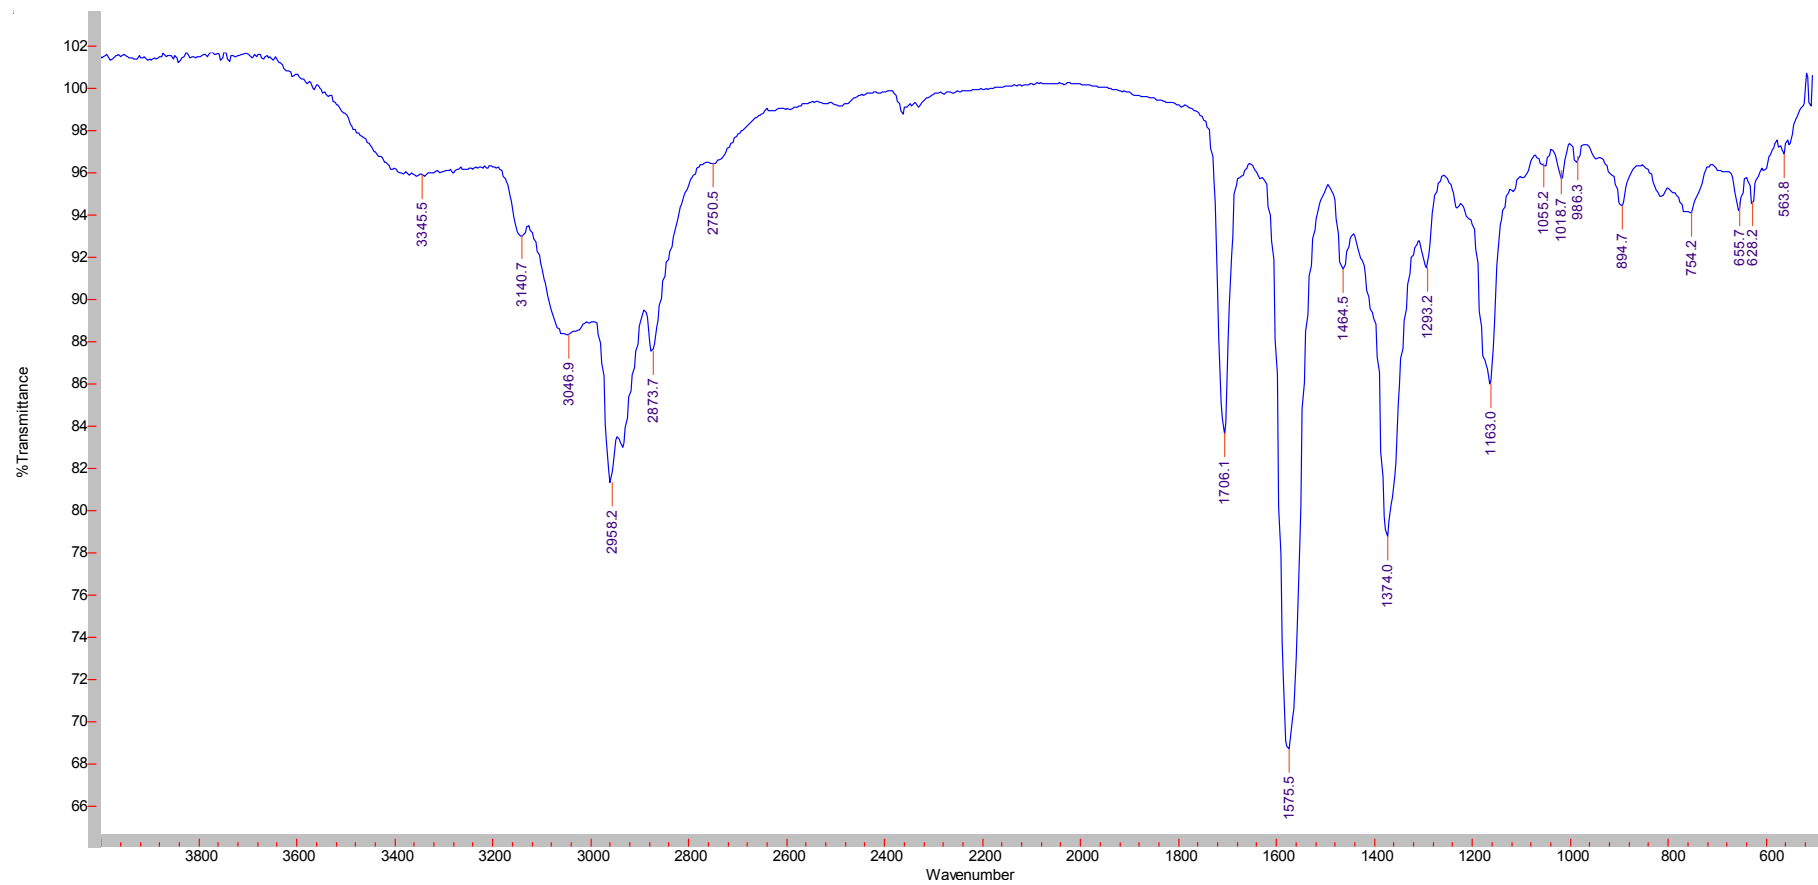

Fig S13. IR of N<sub>8881</sub>Lev at 25 °C

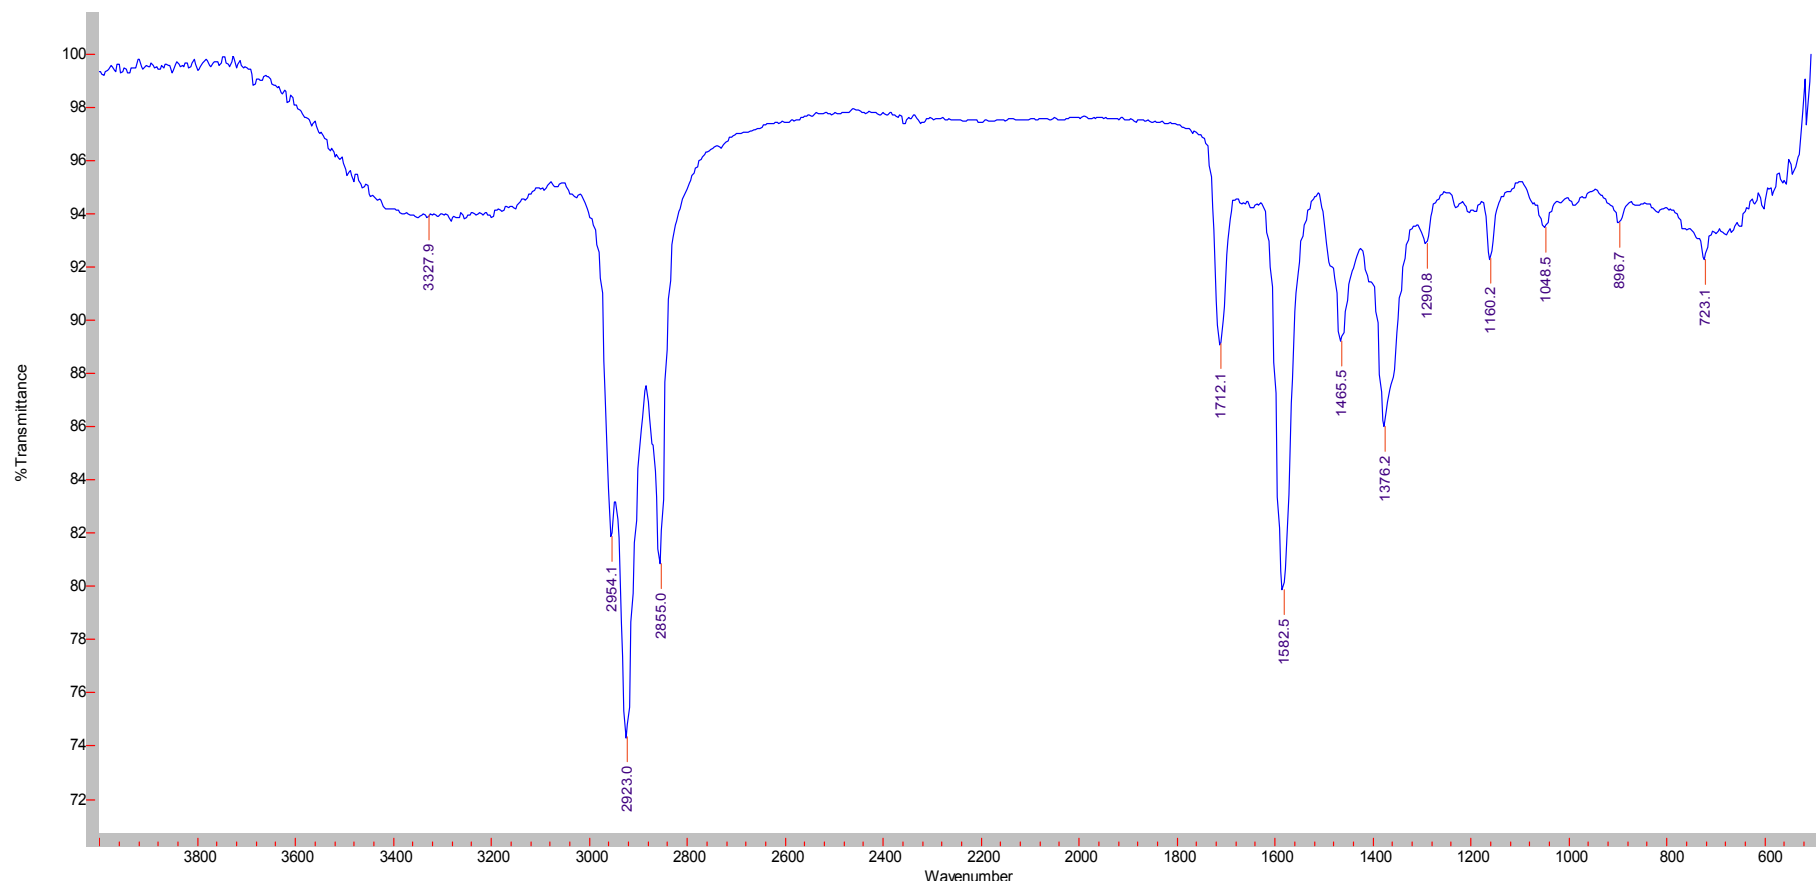

Fig S14. IR of P<sub>8881</sub>Lev at 25 °C

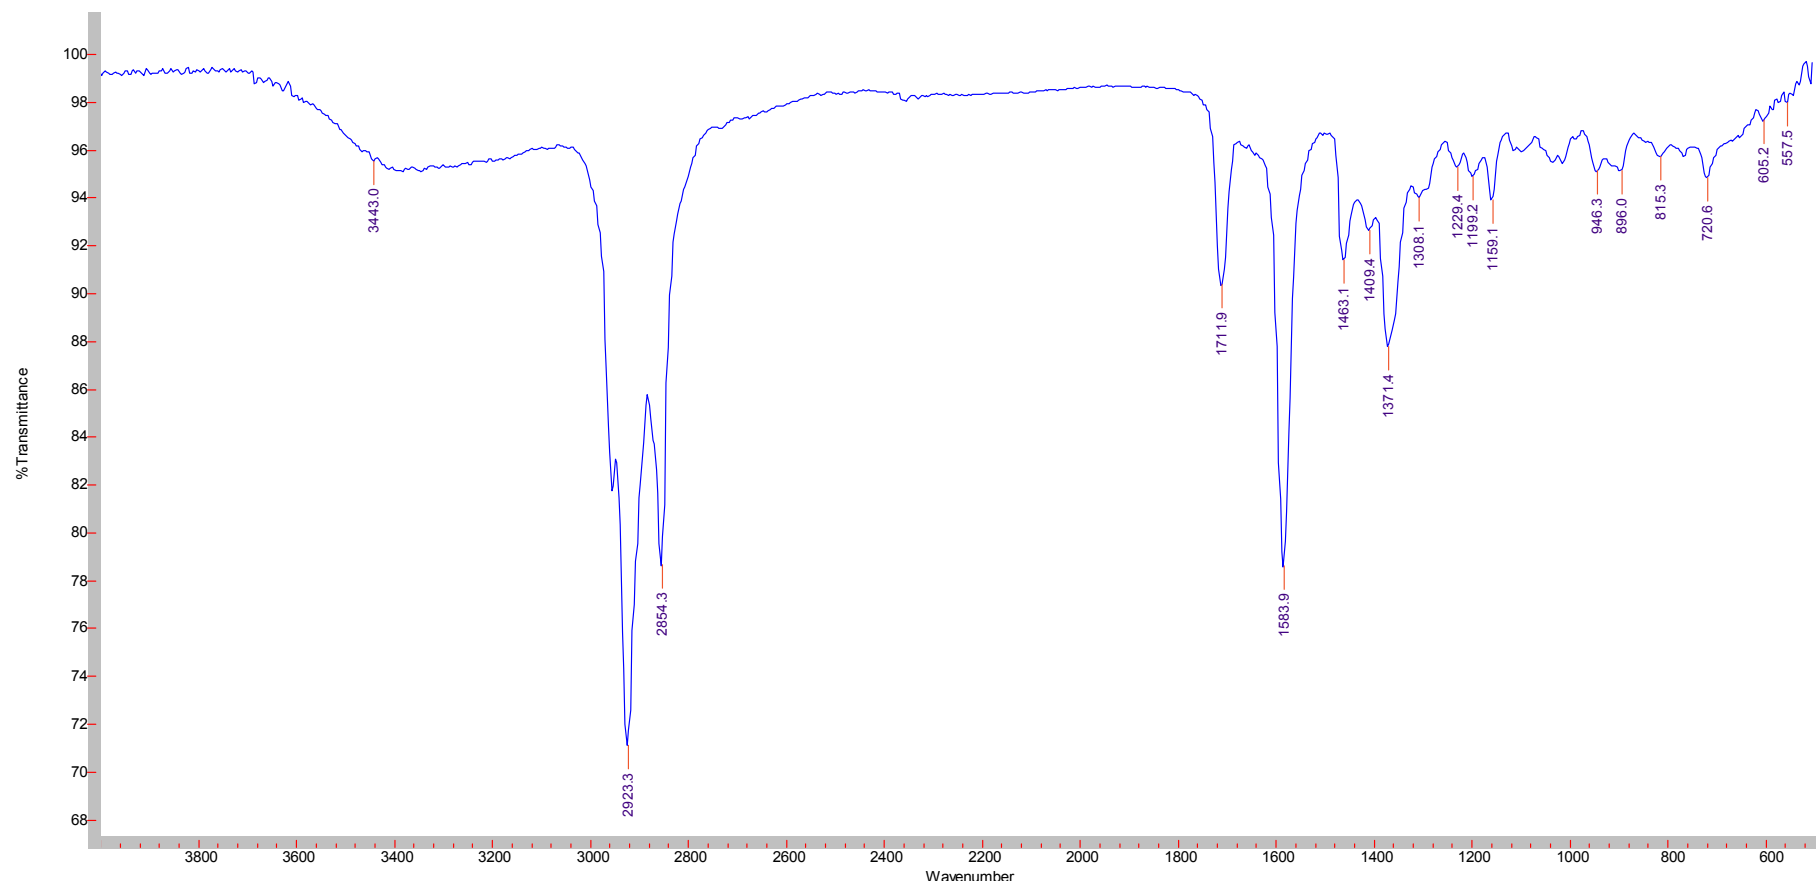

**Fig S15.** Thermal gravimetric analysis (TGA) of **EMIMLev**

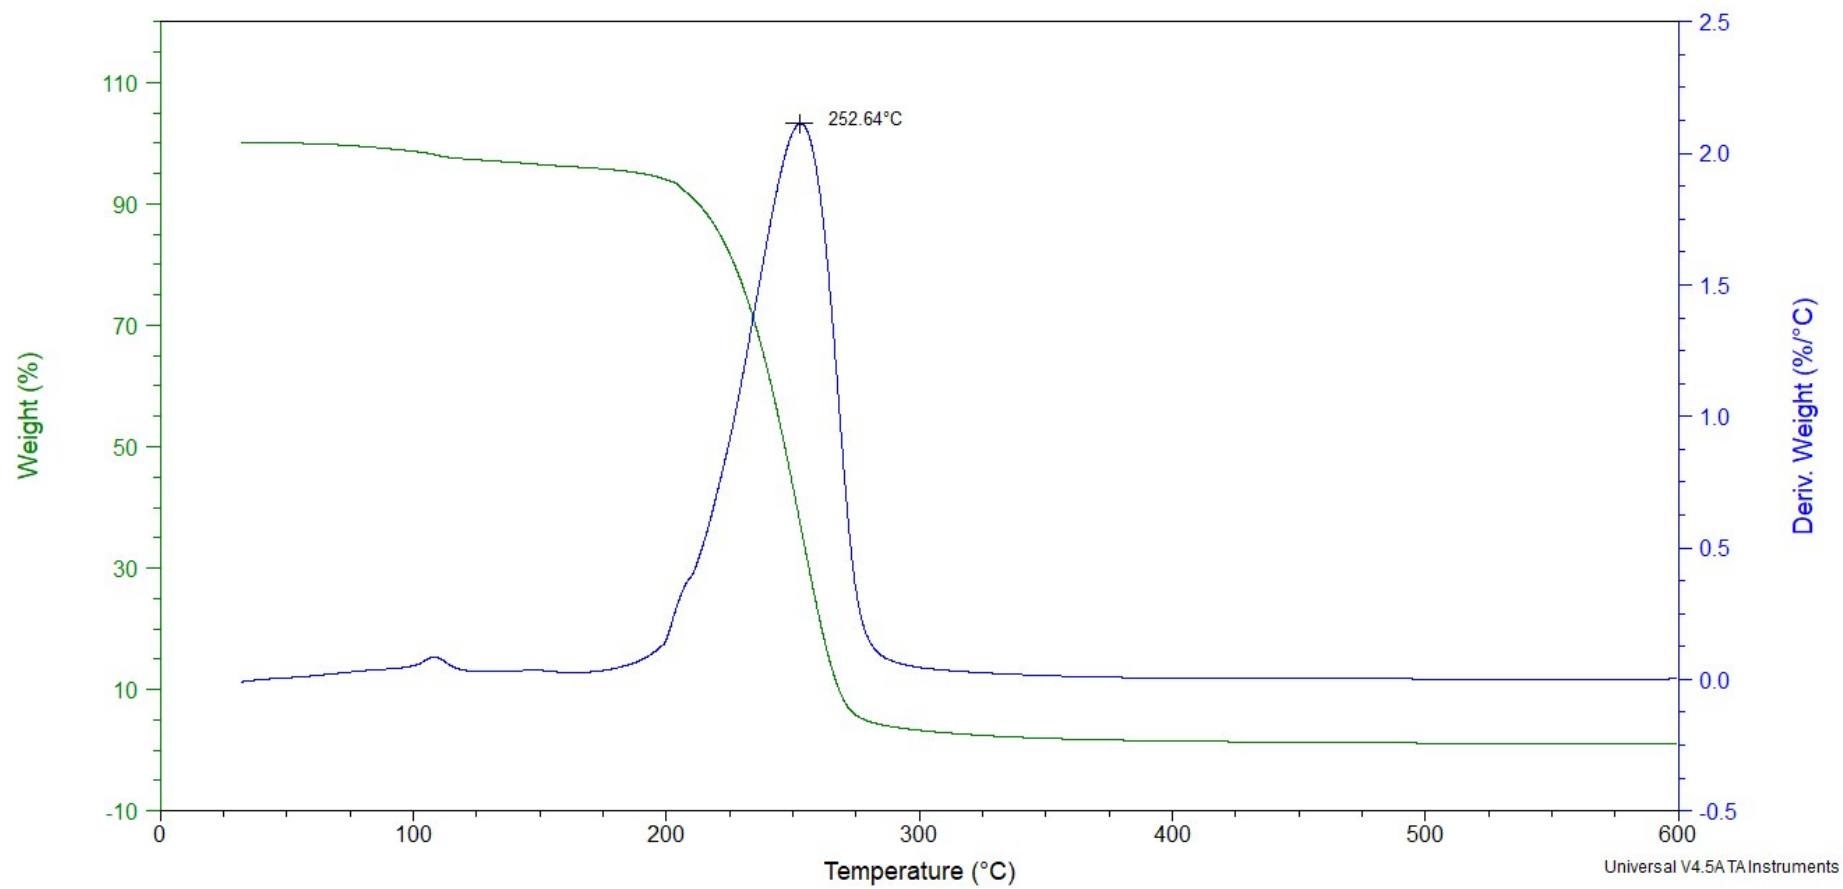



**Fig S16.** Thermal gravimetric analysis (TGA) of **BMIMLev**

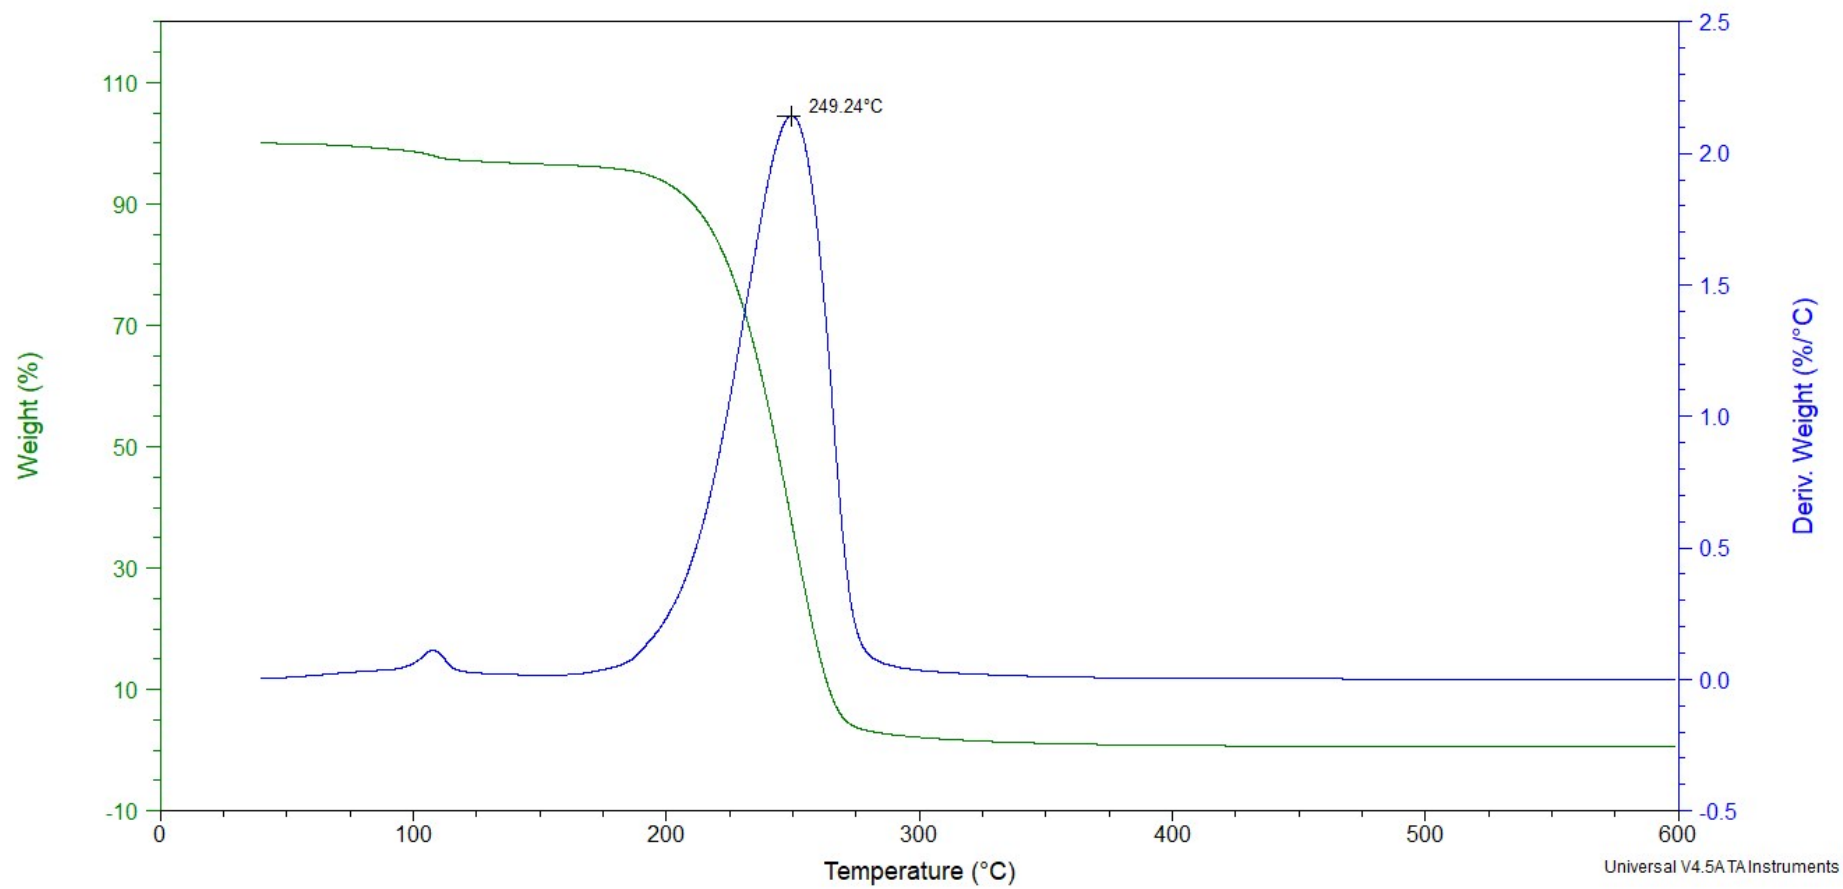

**Fig S17.** Thermal gravimetric analysis (TGA) of **N<sub>8881</sub>Lev**

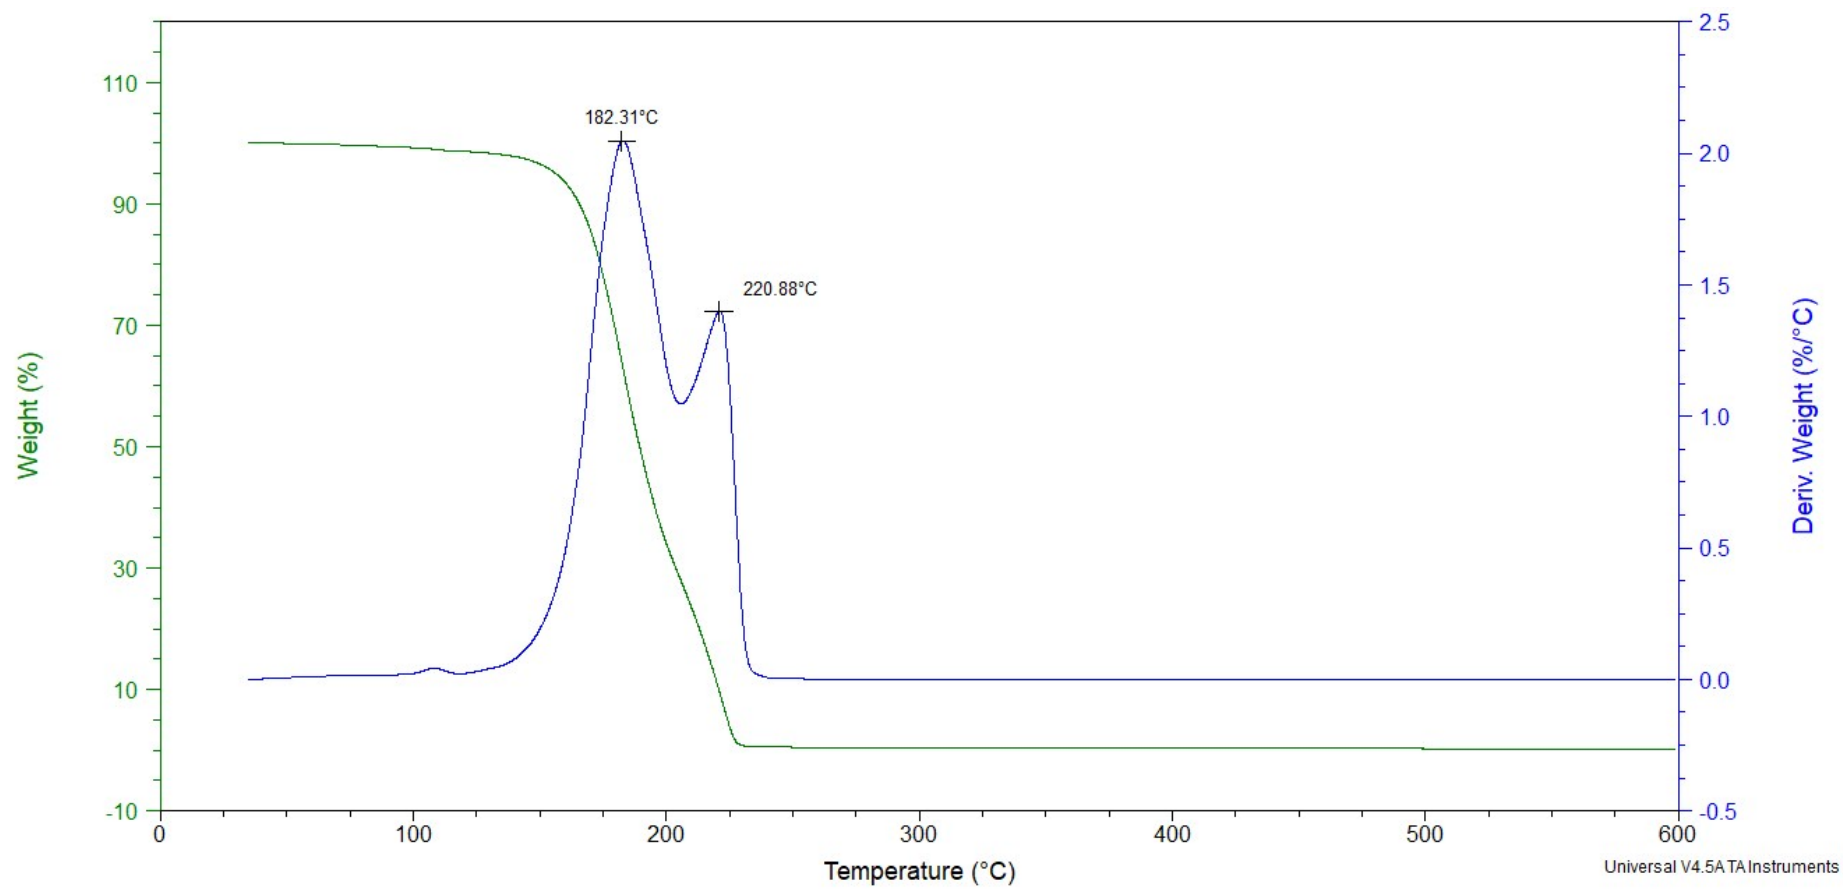

**Fig S18.** Thermal gravimetric analysis (TGA) of **P<sub>8881</sub>Lev**

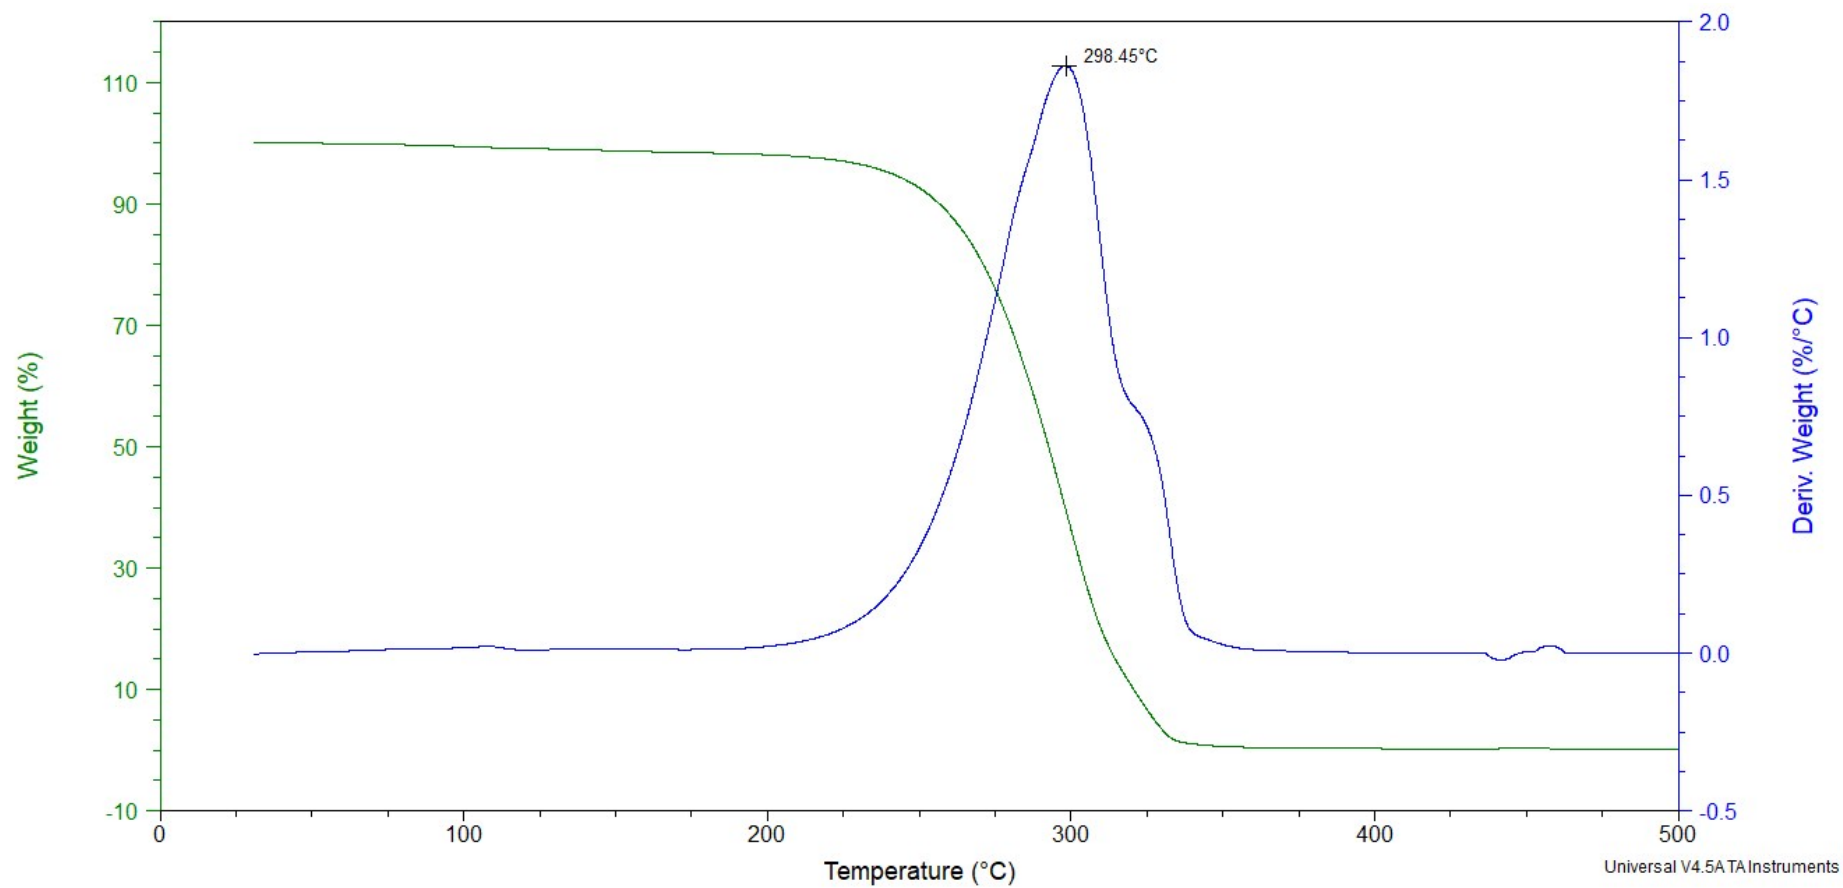

**Fig S19:** Pictures of dissolved MCC in **EMIMLev**: 25 °C, 6 wt% (A); 40 °C, 8 wt% (B); 60 °C, 18 wt%(C); 80 °C, 26 wt%(D); 100 °C, 29 wt%(E)

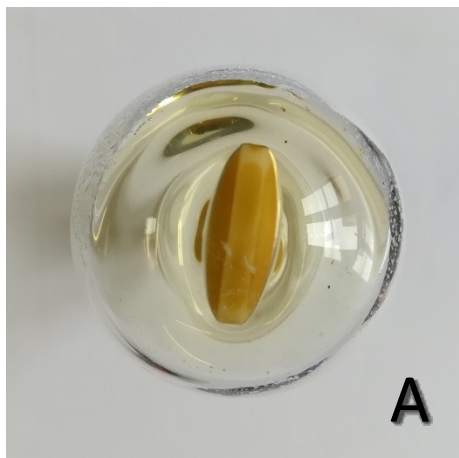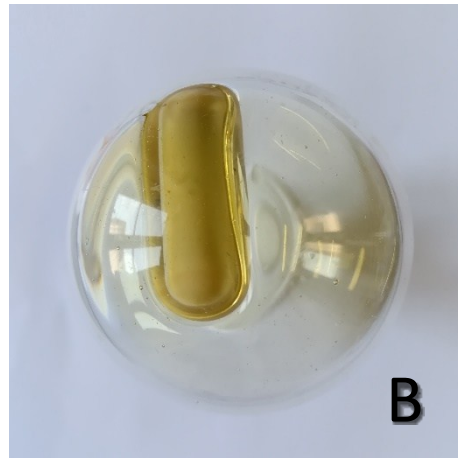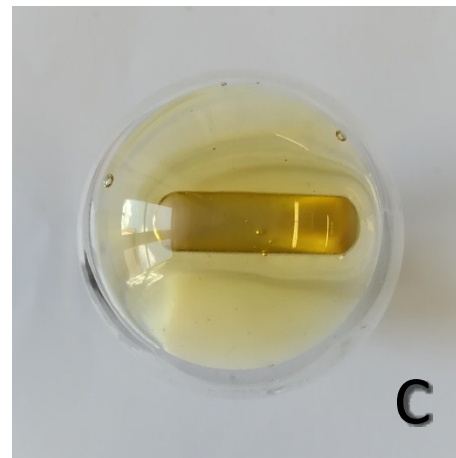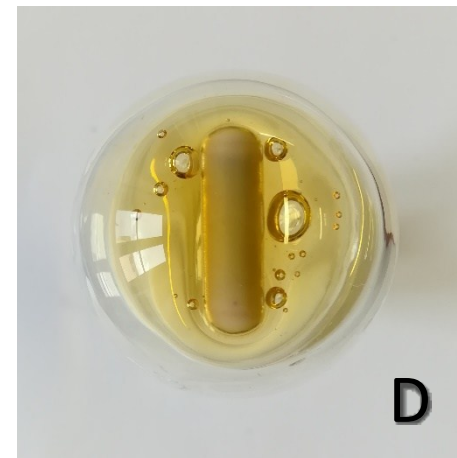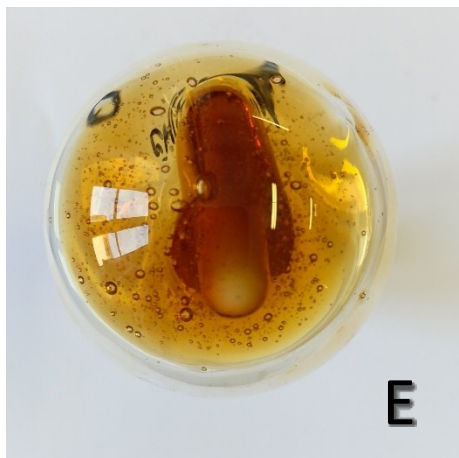

**Fig S20:** Picture of undissolved MCC in **EMIMLev** (100 °C, 30 wt%)

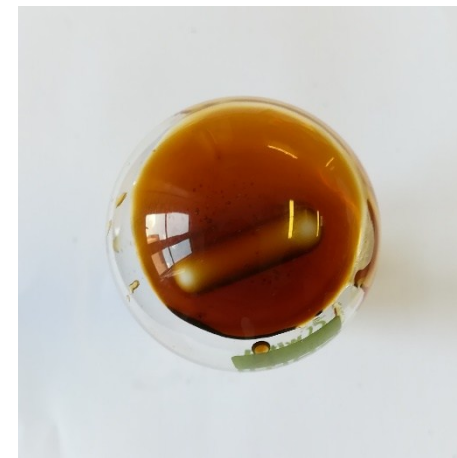

**Fig S21:** Dissolved MCC in **EMIMLev**, at 60 °C, with addition of a precise amount (10% mol) of contaminants: H<sub>2</sub>O (A), MeOH (B), EtOH (C)

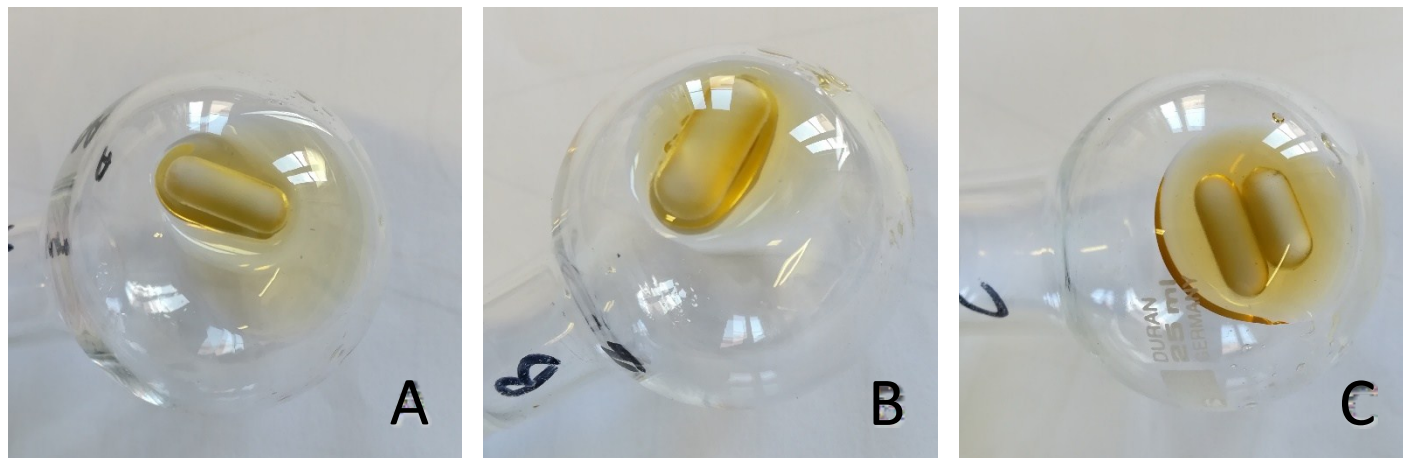

**Fig S22:** Pictures of under vacuum dissolved MCC in **EMIMLev**: 25 °C, 8 wt% (A); 40 °C, 12 wt% (B); 60 °C, 20 wt%(C); 80 °C, 33 wt%(D); 100 °C, 38 wt%(E)

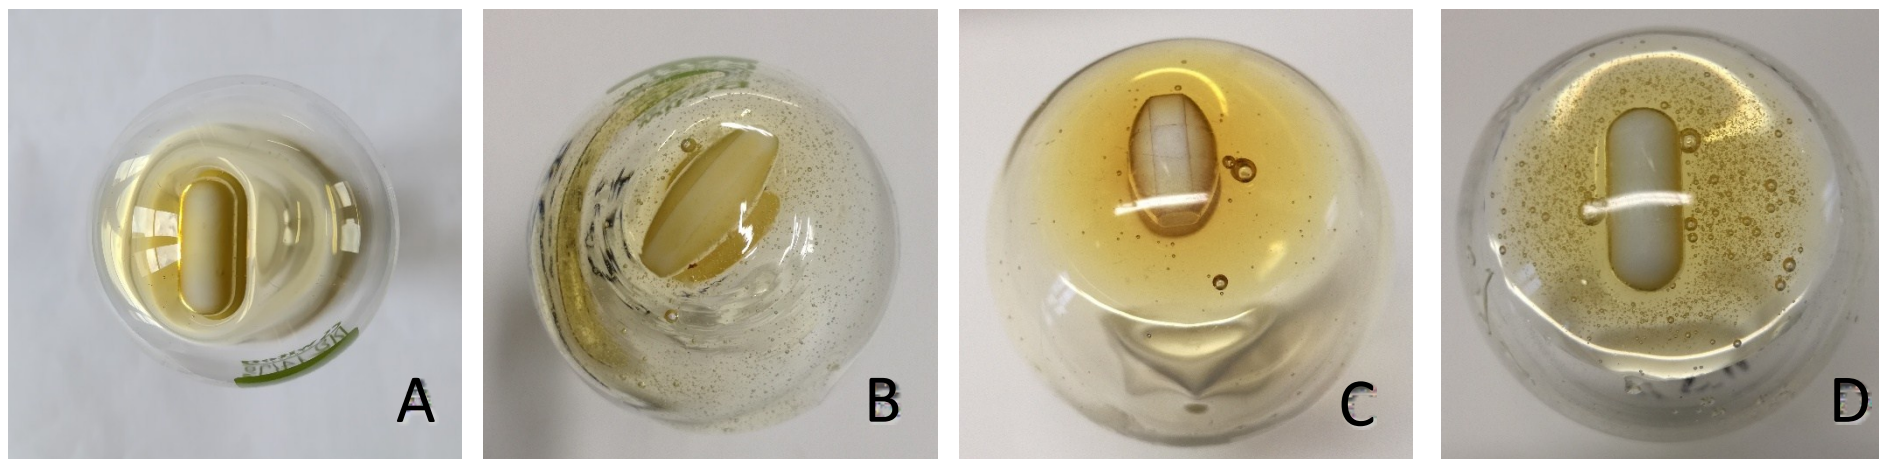

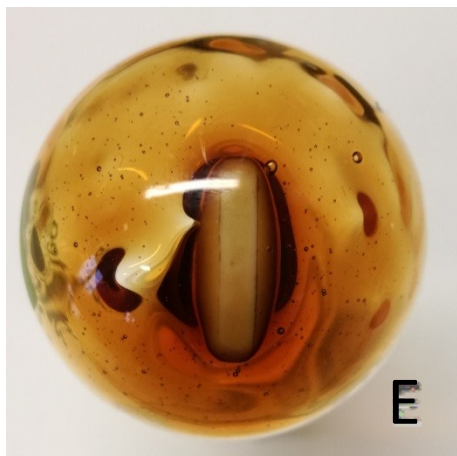

**Fig S23:** Pictures of under vacuum undissolved MCC in **EMIMLev (A)** (100 °C, 38.5 wt%) and under vacuum dissolved MCC in two-time recycled **EMIMLev (B)** (100 °C, 37% MCC)

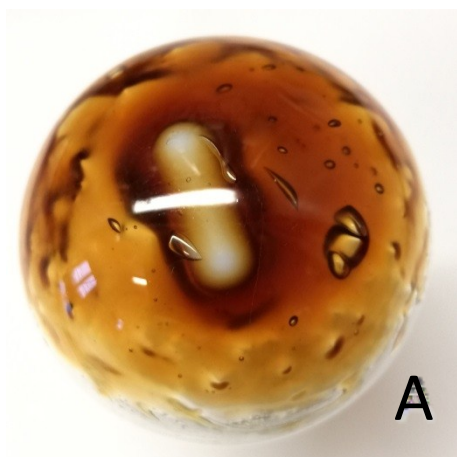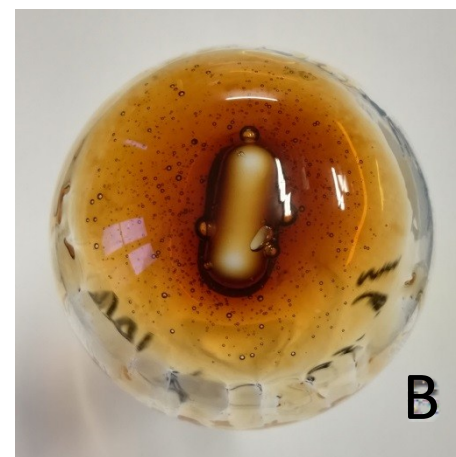

**Fig S24:** Picture of dissolved MCC in **BMIMLev**: 25 °C, 2 wt% (A); 40 °C, 7 wt% (B); 60 °C, 16 wt% (C); 80°C, 22 wt%(D); 100 °C, 24 wt%(E)

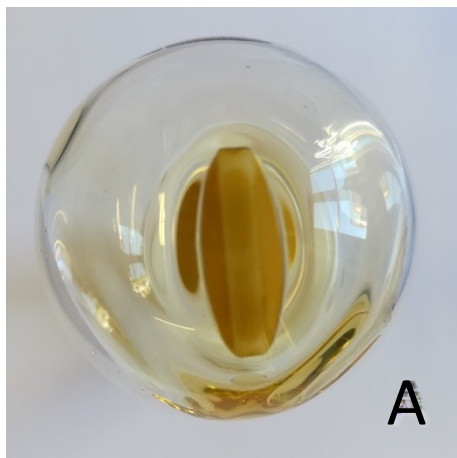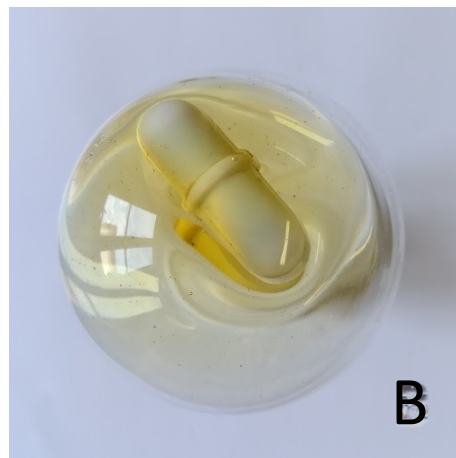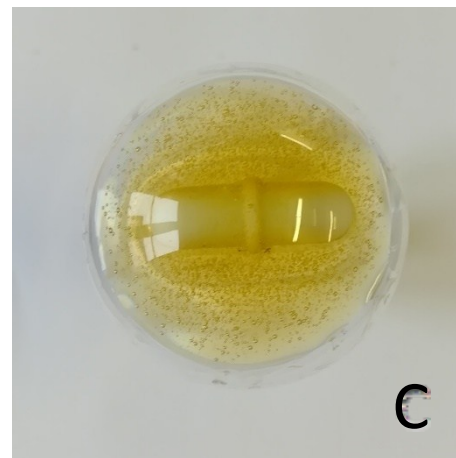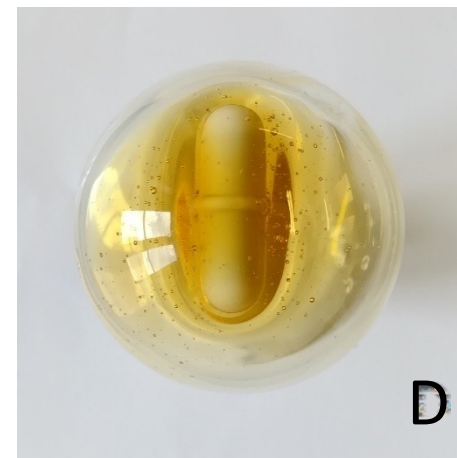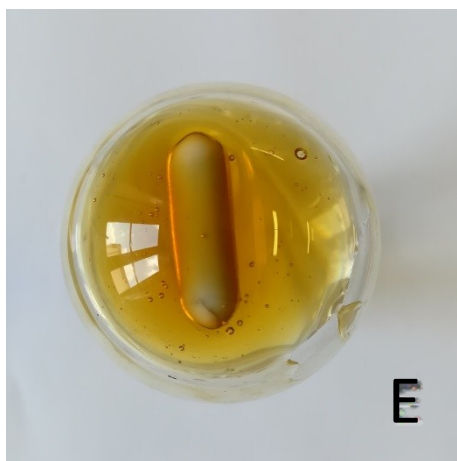

**Fig S25:** Picture of under vacuum dissolved MCC in **BMIMLev**: 25 °C, 3 wt%(A); 40 °C, 12 wt% (B); 60 °C, 25 wt% (C); 80°C, 31 wt%(D); 100 °C, 34 wt%(E)

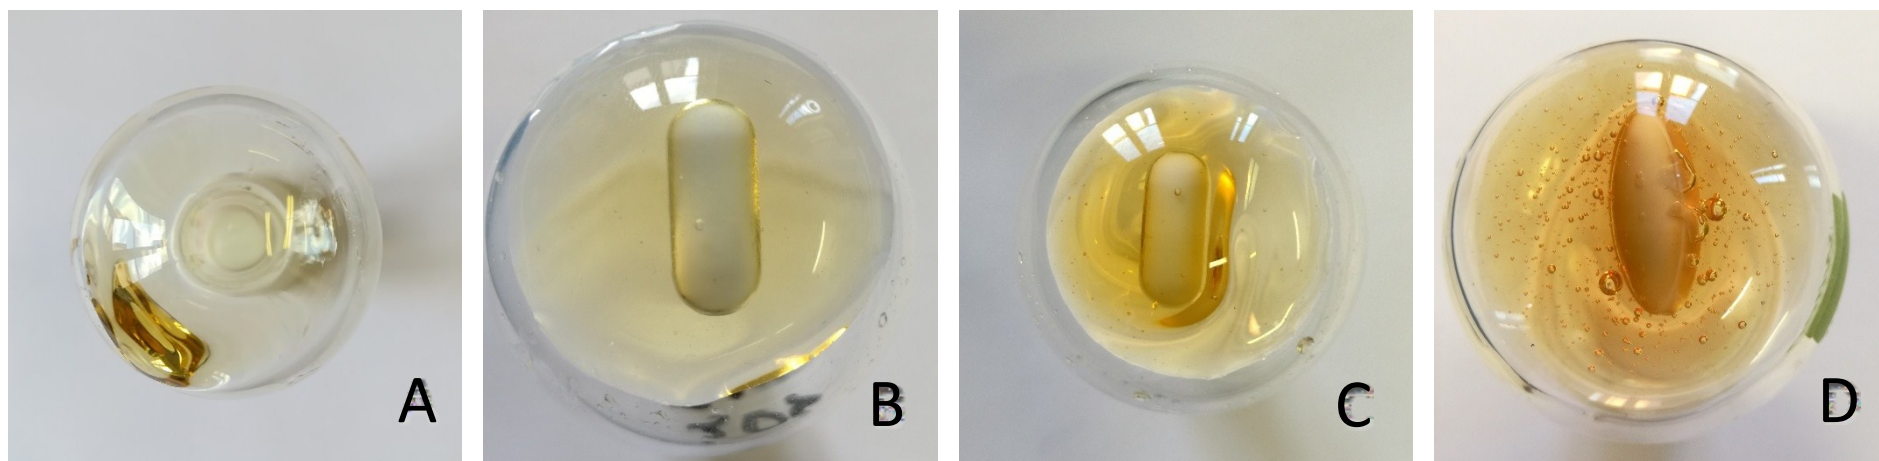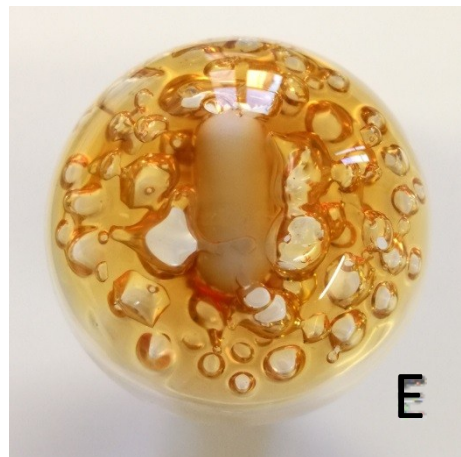

**Fig S26:** Picture of under vacuum undissolved MCC in **BMIMLev** (100 °C, 34.5 wt%)

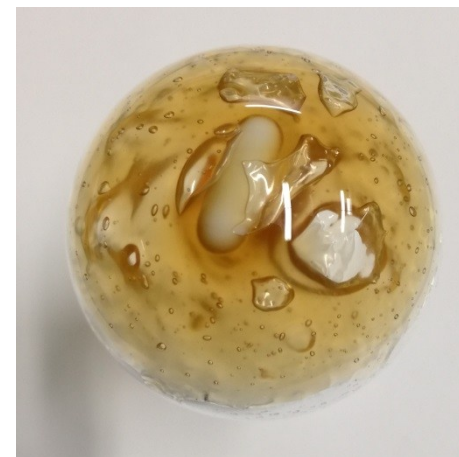



**Fig S27:** Pictures of dissolved MCC in **N<sub>8881</sub>Lev/DMSO**: 60 °C, 9 wt% (A); 80 °C, 10 wt% (B); 100 °C, 12 wt%(C). MCC dissolved in **N<sub>8881</sub>Lev/DMSO** under vacuum at room temperature: 25 °C, 13 wt% (D)

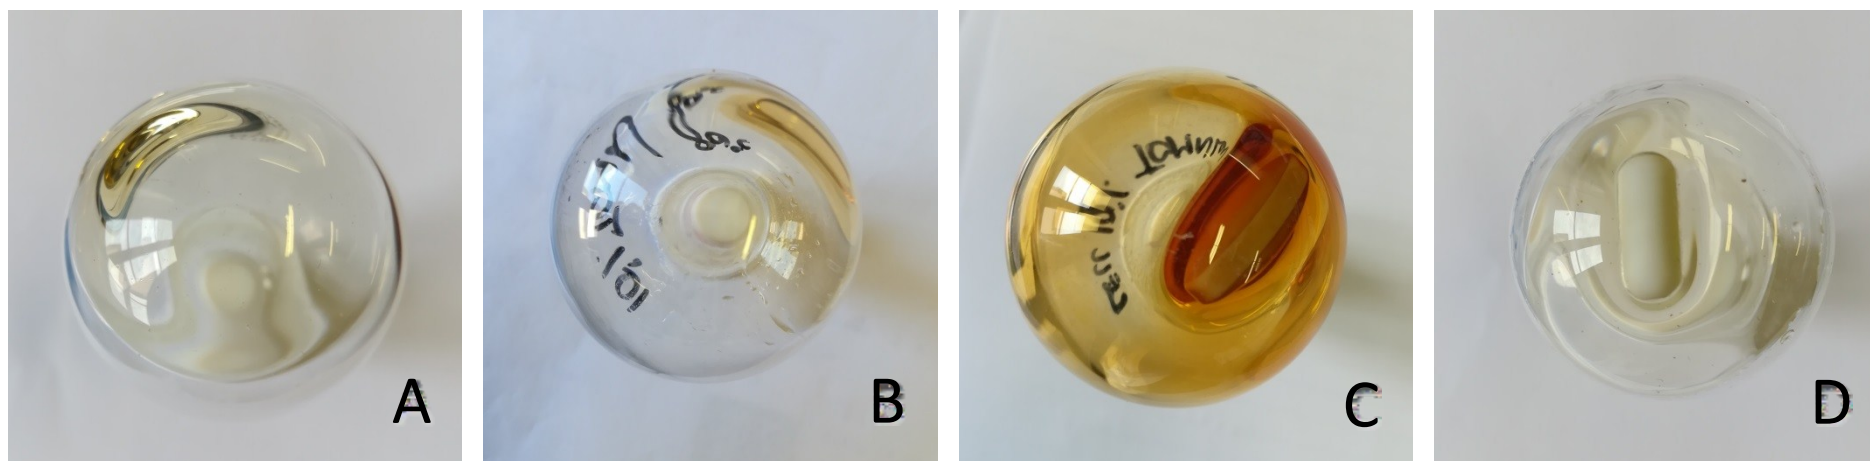

**Fig S28:** Pictures of dissolved MCC in **P<sub>8881</sub>Lev/DMSO**: 60 °C, 7 wt% (A); 80 °C, 8 wt% (B); 100 °C, 10 wt%(C). Cellulose dissolved in **P<sub>8881</sub>Lev/DMSO** under vacuum at room temperature: 25 °C, 11 wt% (D)

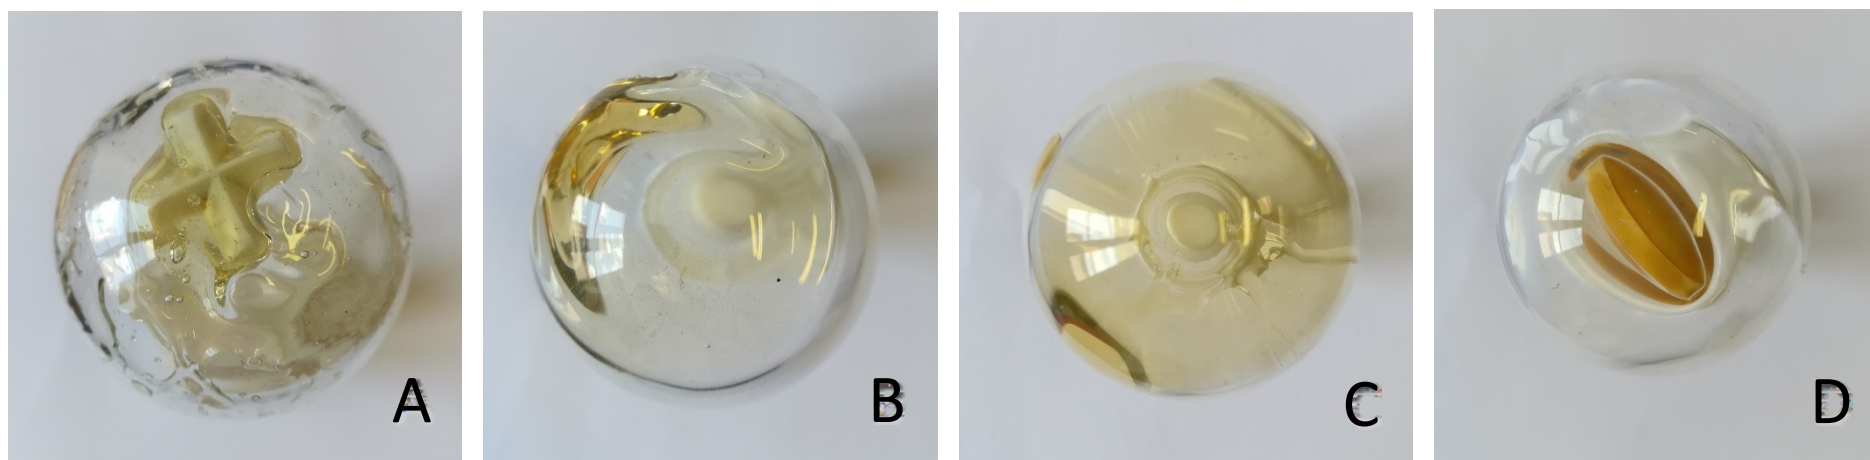

**Fig S29:** Optical microscopy of MCC dissolved in **EMIMLev** (100 °C, 29 wt%), 4x(**A**) and 15x (**B**)

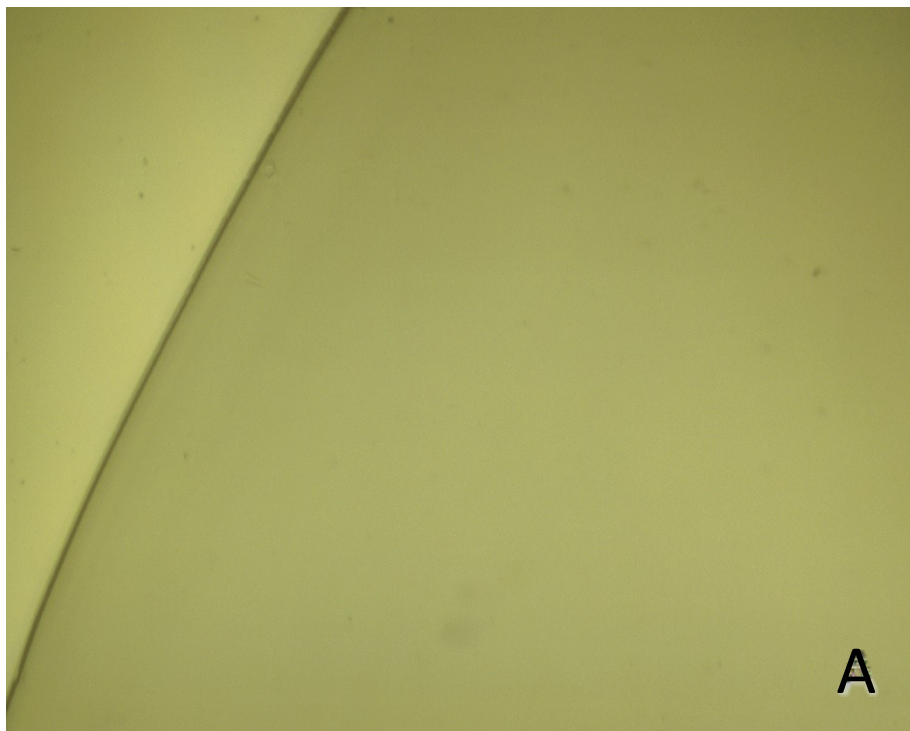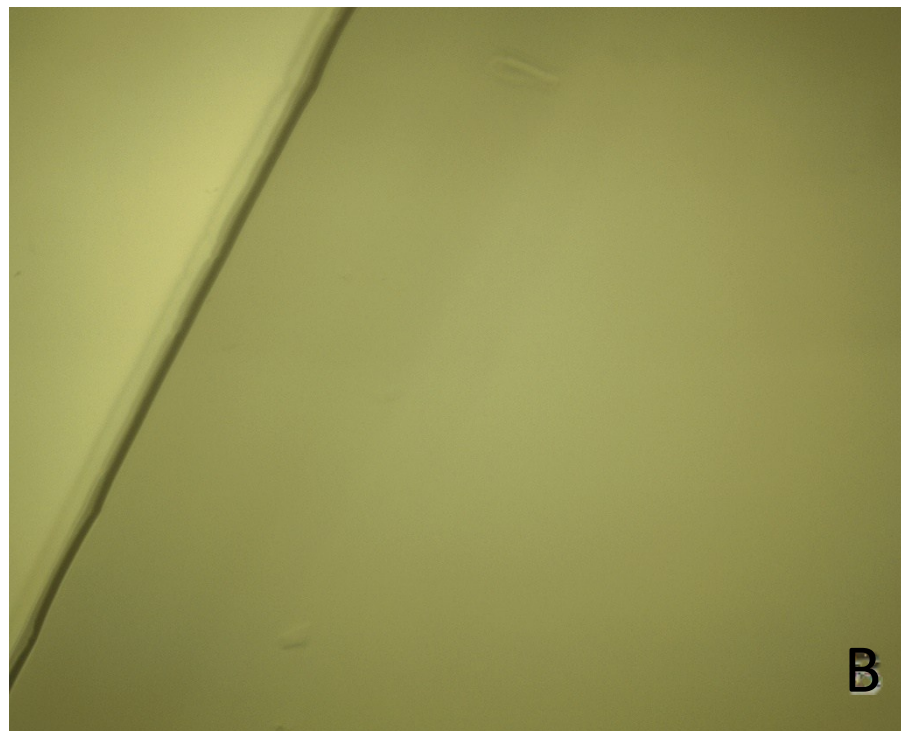

**Fig S30:** Microcrystalline cellulose not completely dissolved in **EMIMLev** (100 °C, 30 wt%), 4x(**A**) and 15x (**B**),

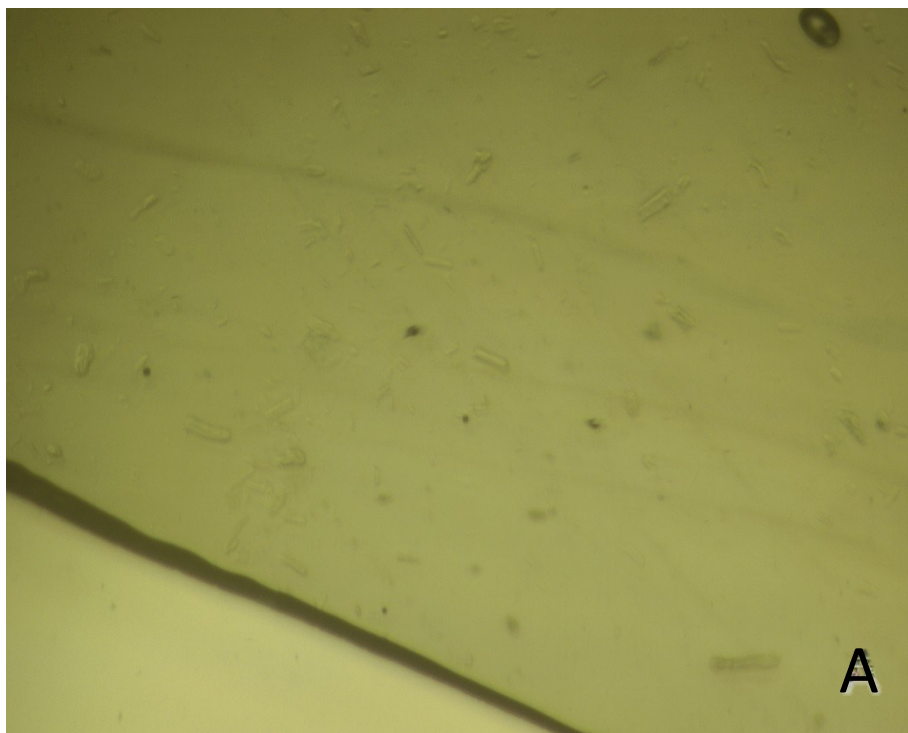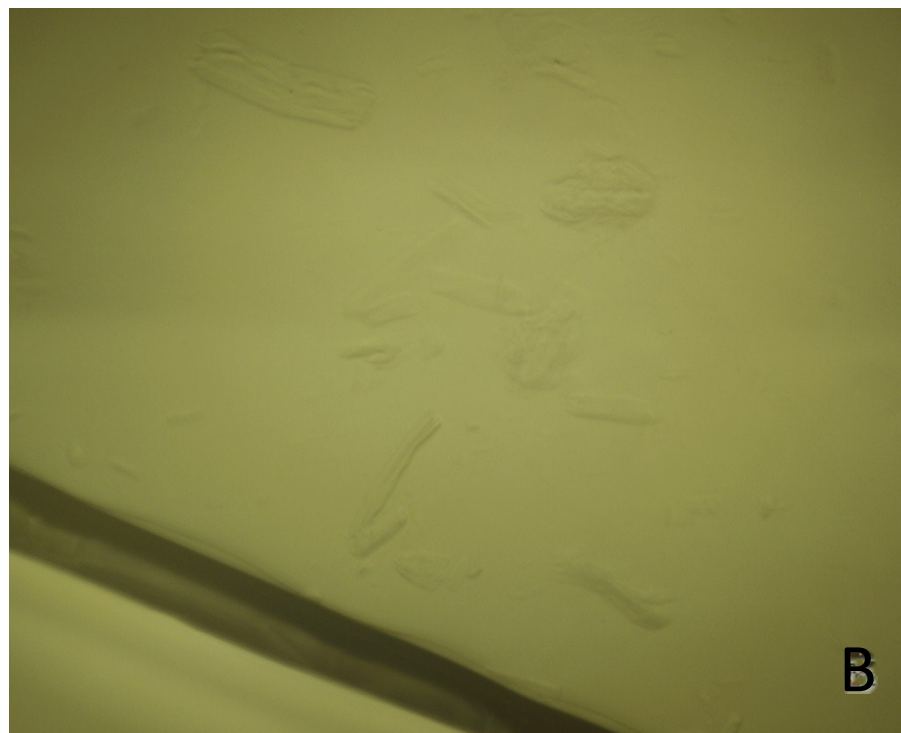

**Fig S31:** Optical microscopy of under vacuum dissolved MCC in **EMIMLev** (100 °C, 38 wt%), 4x(**A**) and 15x (**B**)

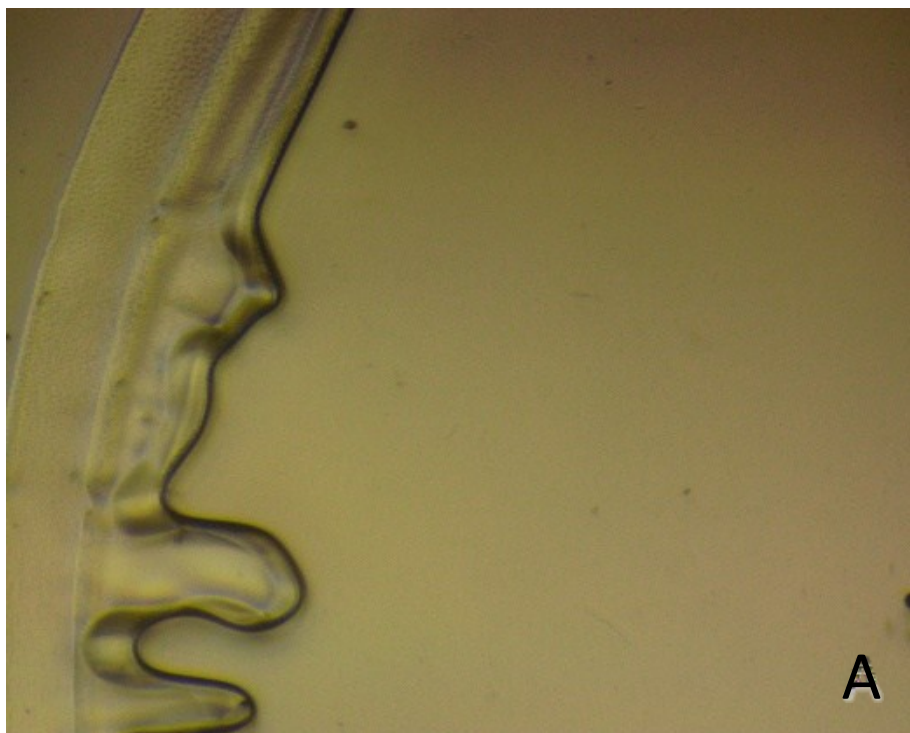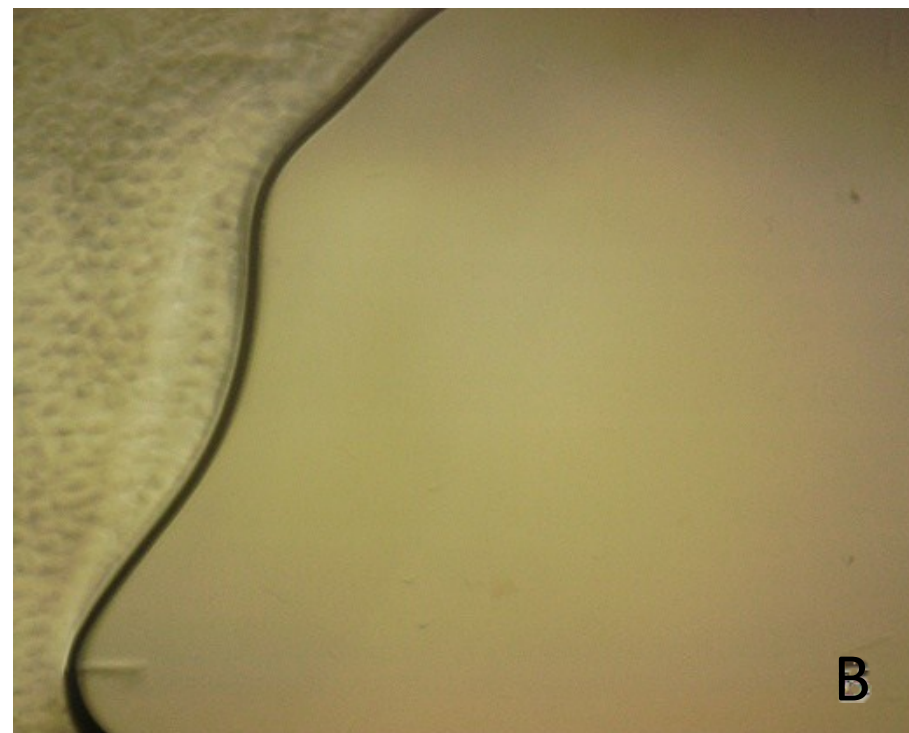

**Fig S32:** Optical microscopy of MCC dissolved in **BMIMLev** (100 °C, 24 wt%), 4x(**A**) and 15x (**B**)

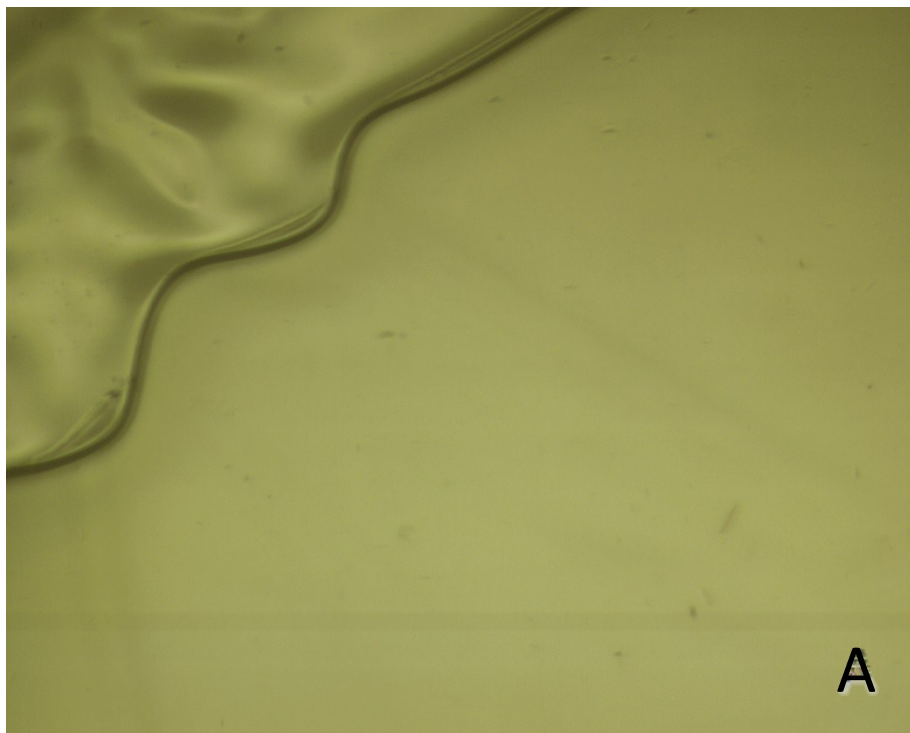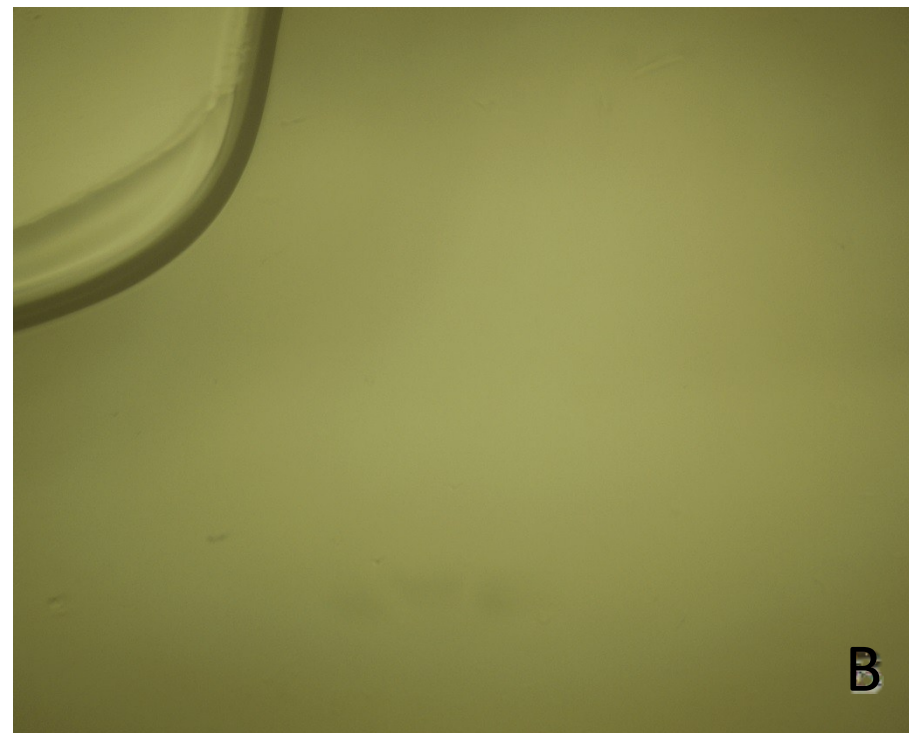

**Fig S33:** Optical microscopy of under vacuum dissolved MCC in **BMIMLev** (100 °C, 34 wt%), 4x(**A**) and 15x (**B**)

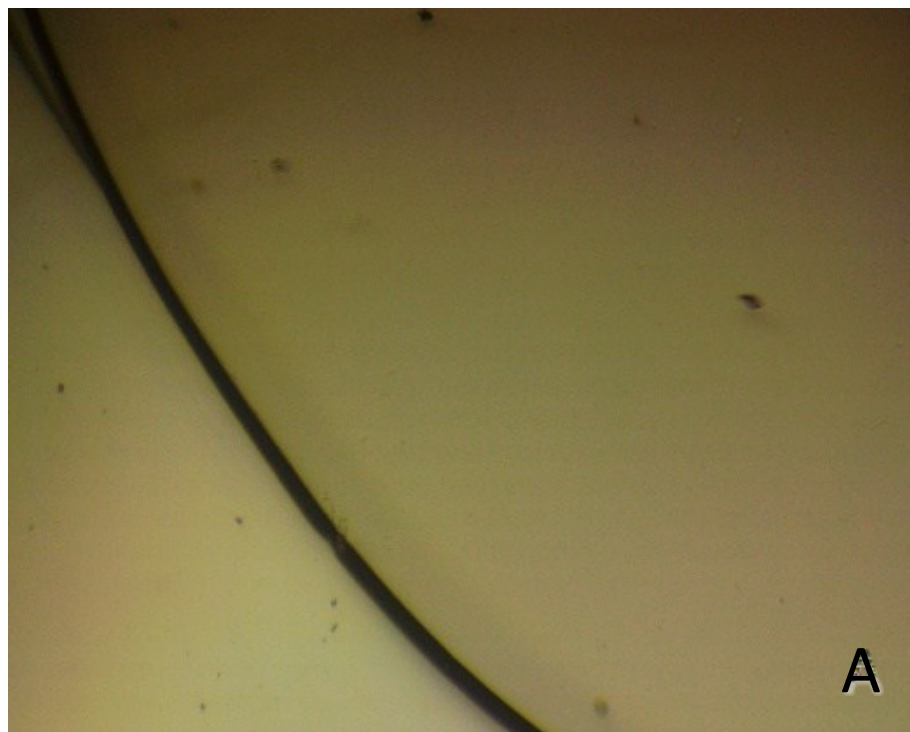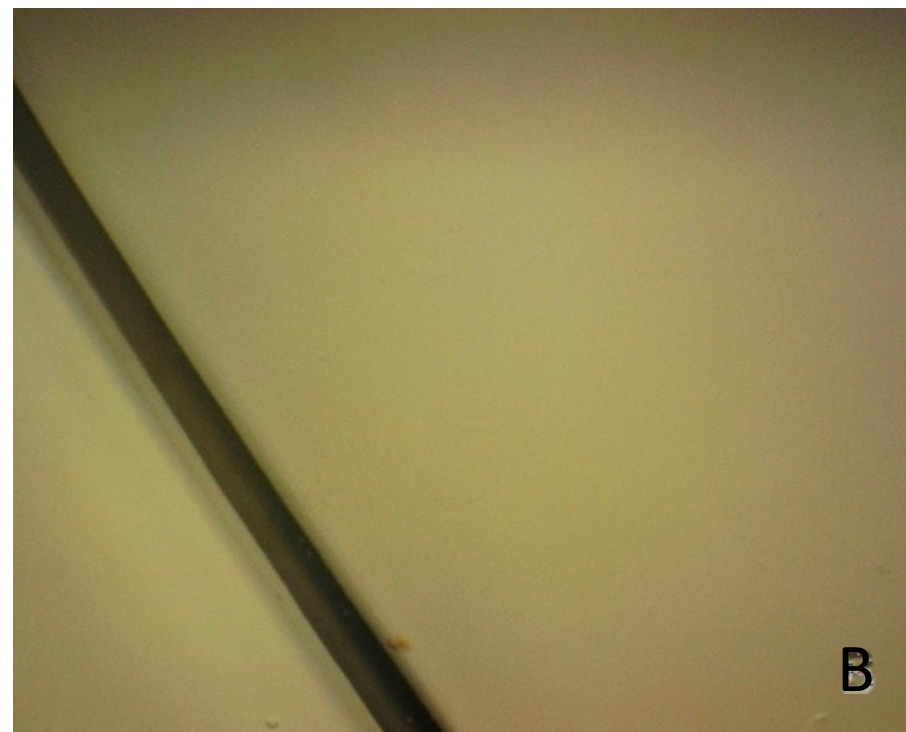

**Fig S34:** Optical microscopy of MCC dissolved in  $N_{8881}Lev/DMSO$  (100 °C, 12 wt%), 4x(A) and 15x (B)

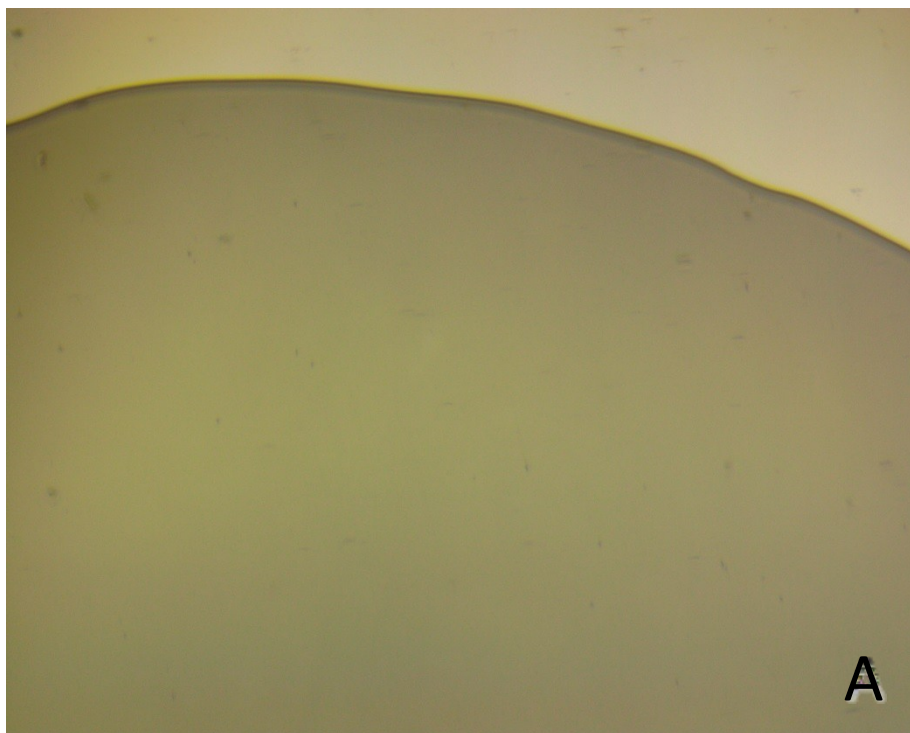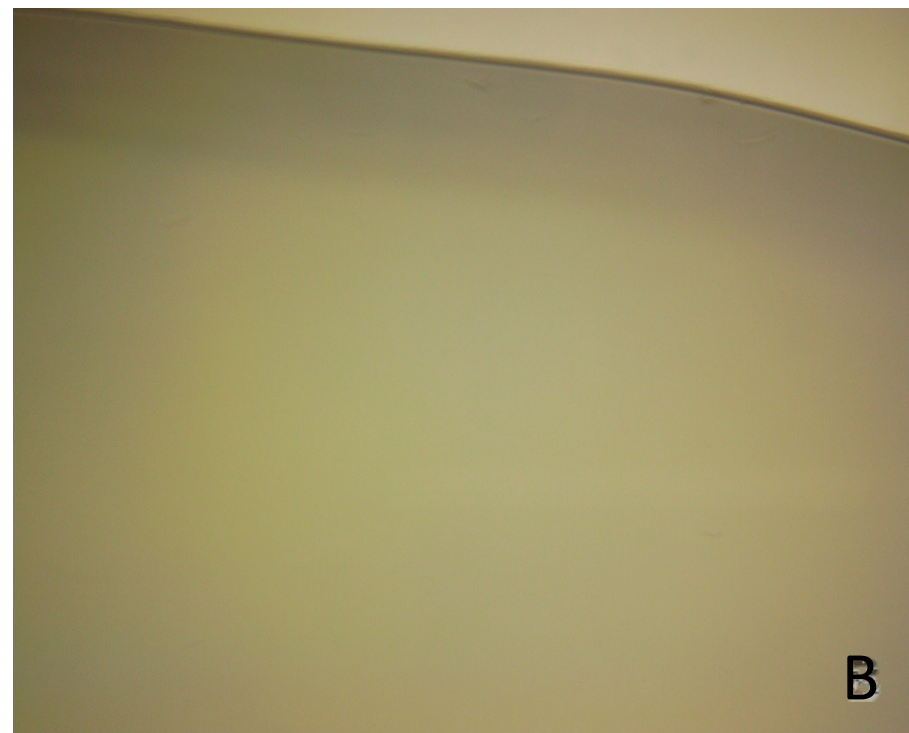

**Fig S35:** Microcrystalline cellulose not completely dissolved in **N<sub>8881</sub>Lev/DMSO** (100 °C, 13 wt%), 4x(**A**) and 15x (**B**),

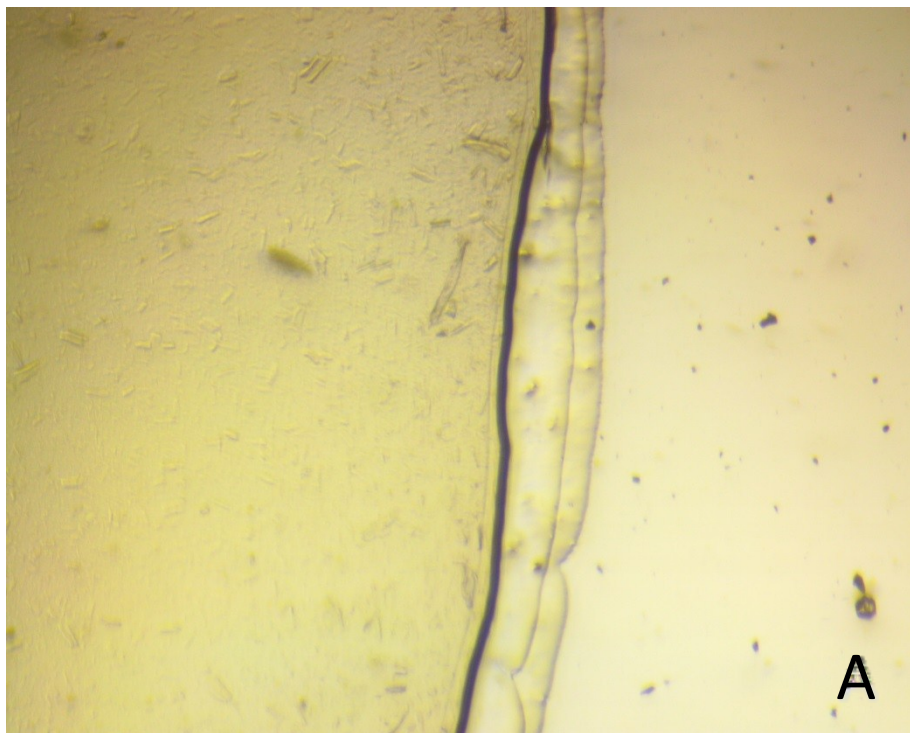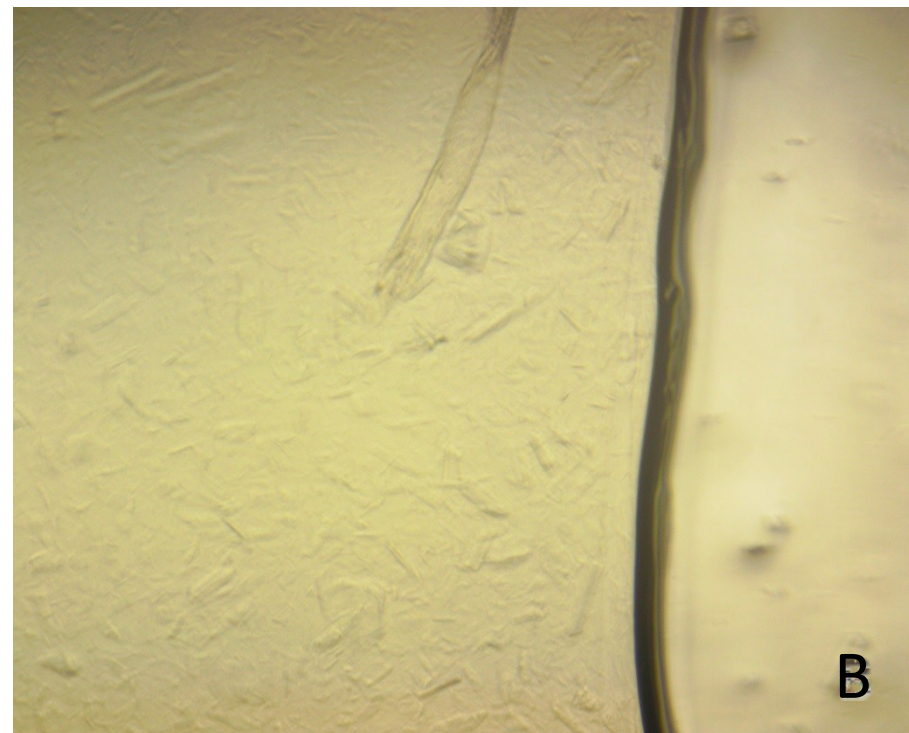



**Fig S36:** Optical microscopy of MCC dissolved in **P<sub>8881</sub>Lev/DMSO** (100 °C, 10 wt%), 4x(**A**) and 15x (**B**)

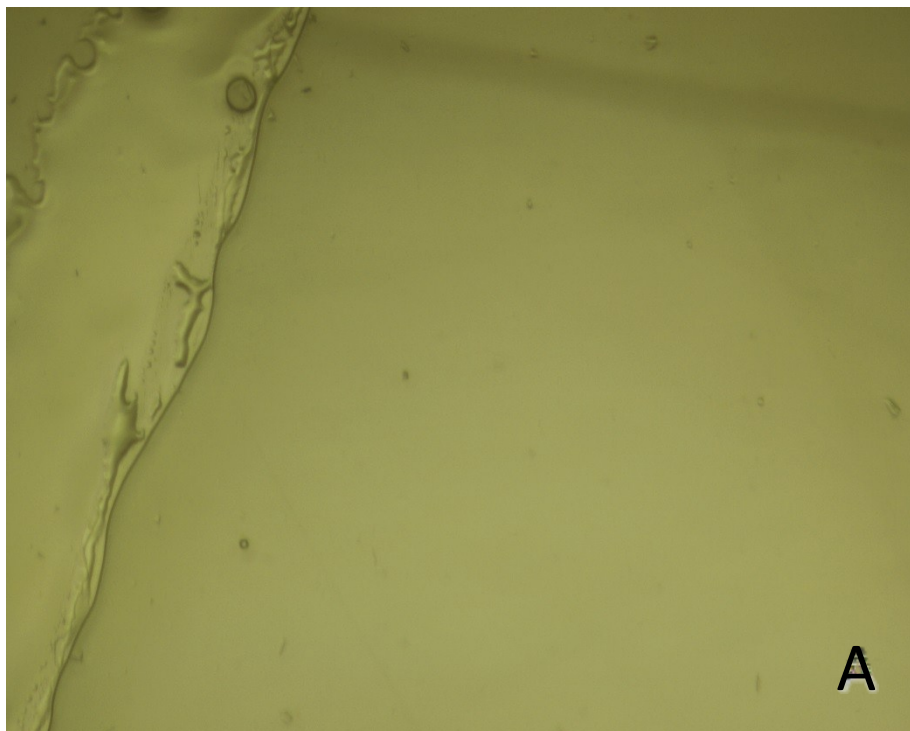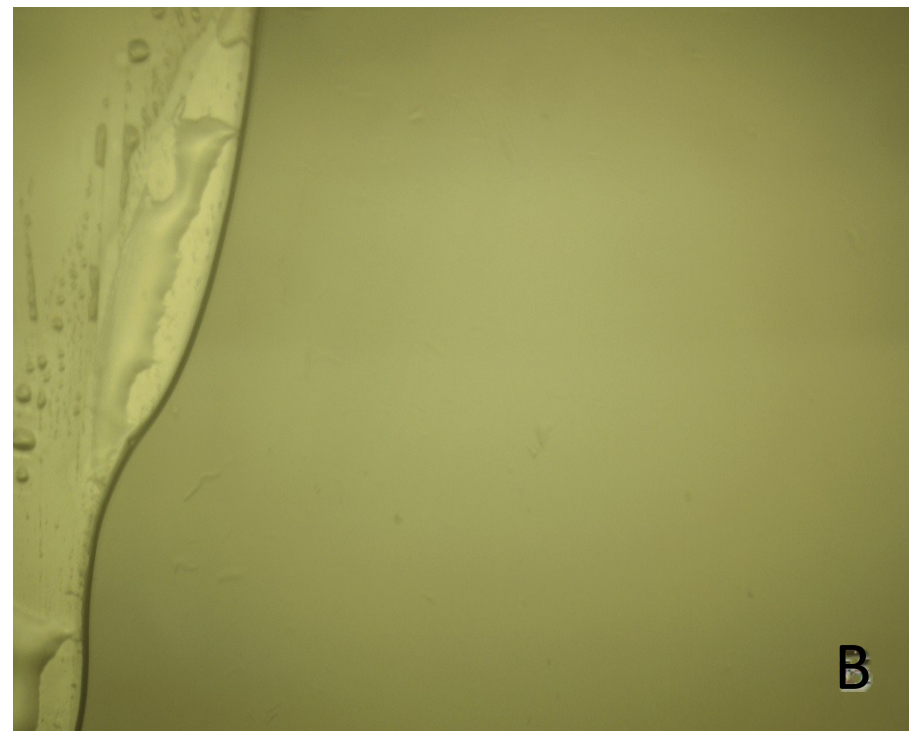

Fig S37: IR of MCC

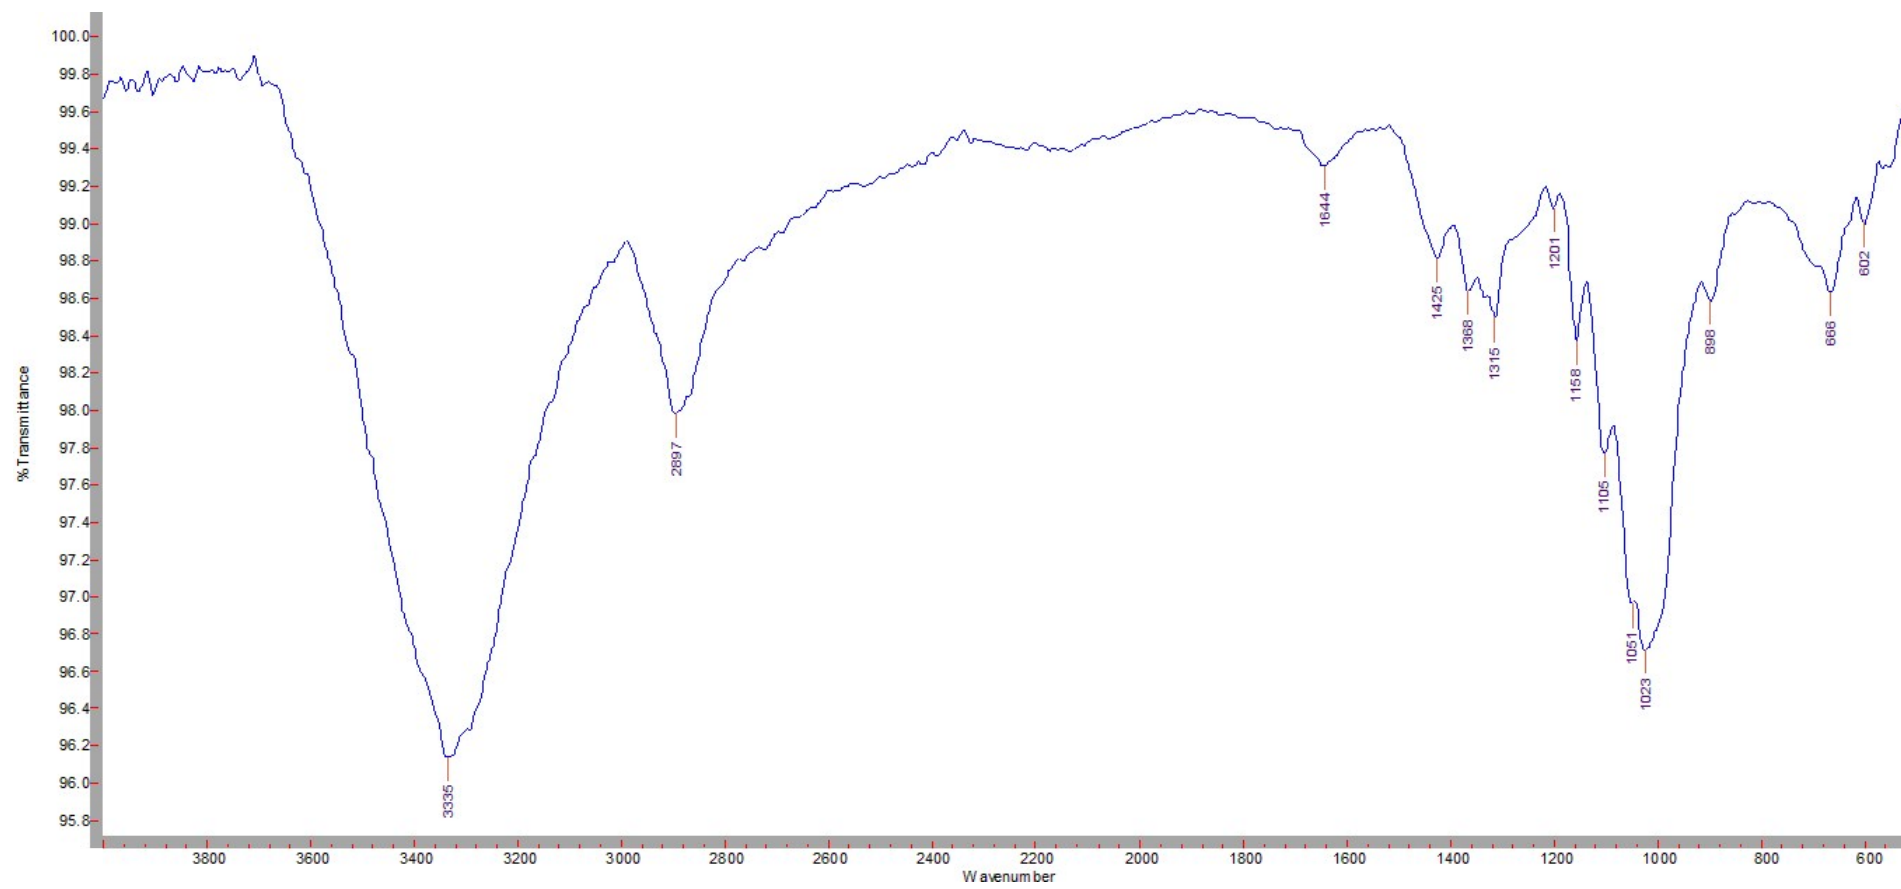

**Fig S38:** IR of regenerated cellulose after dissolution in **EMIMLev** at 100 °C

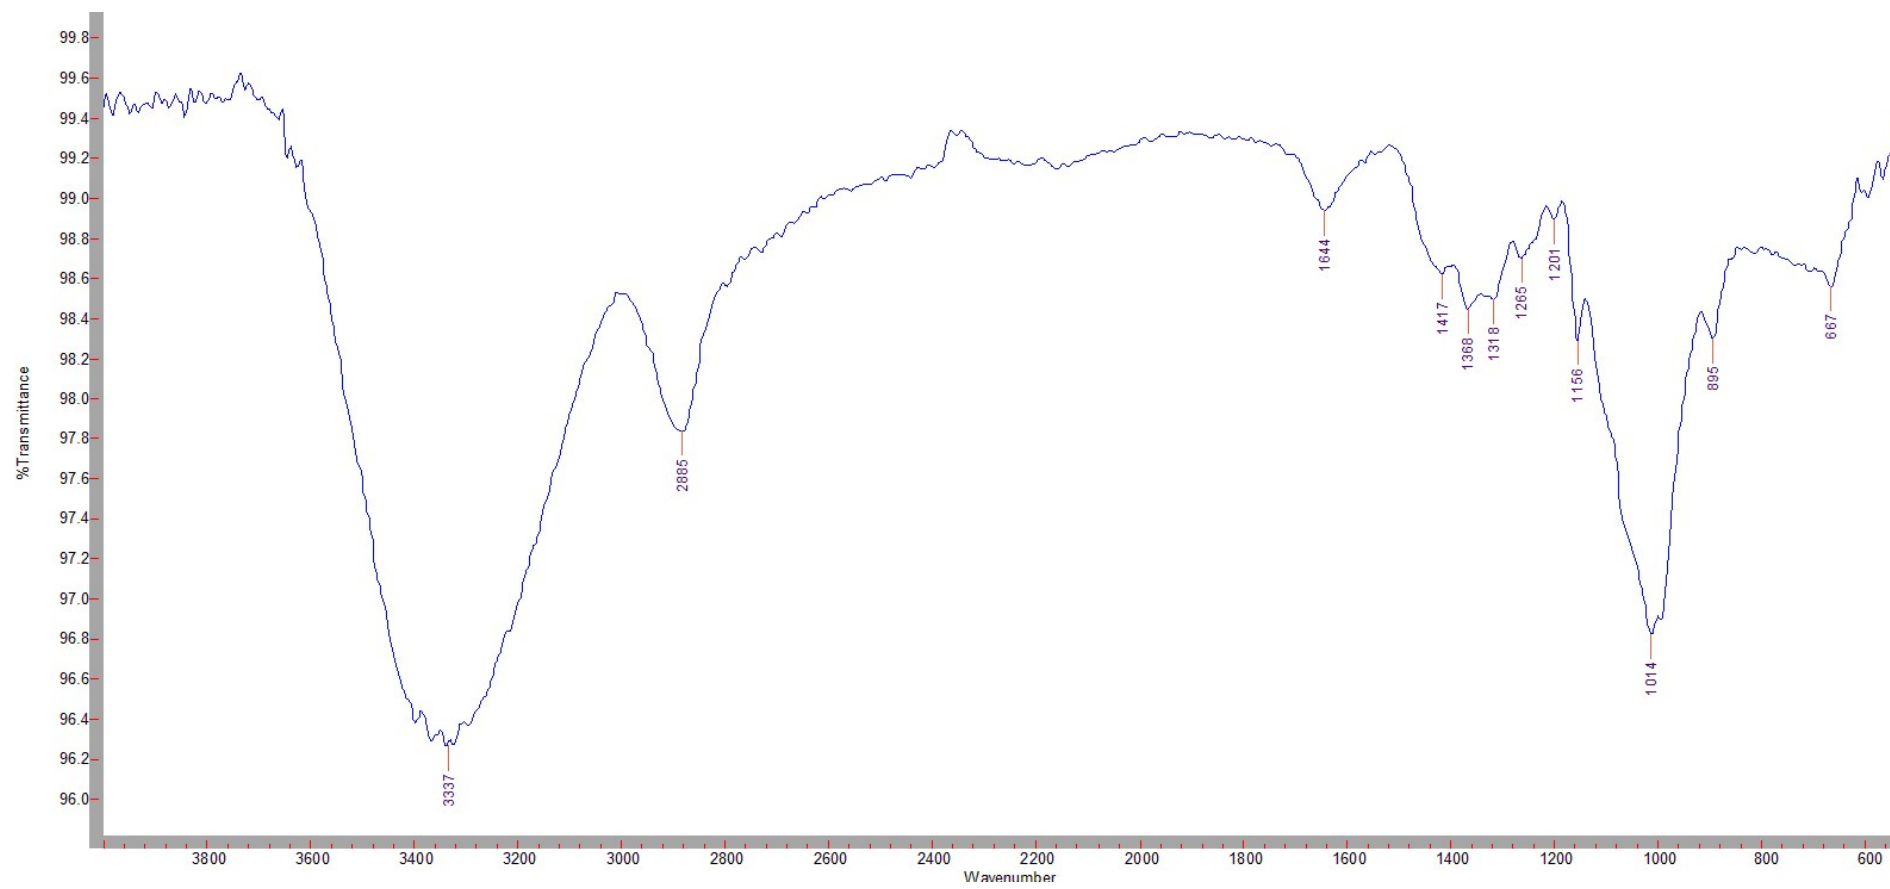

**Fig S39:** IR of regenerated cellulose after dissolution in **BMIMLev** at 100 °C

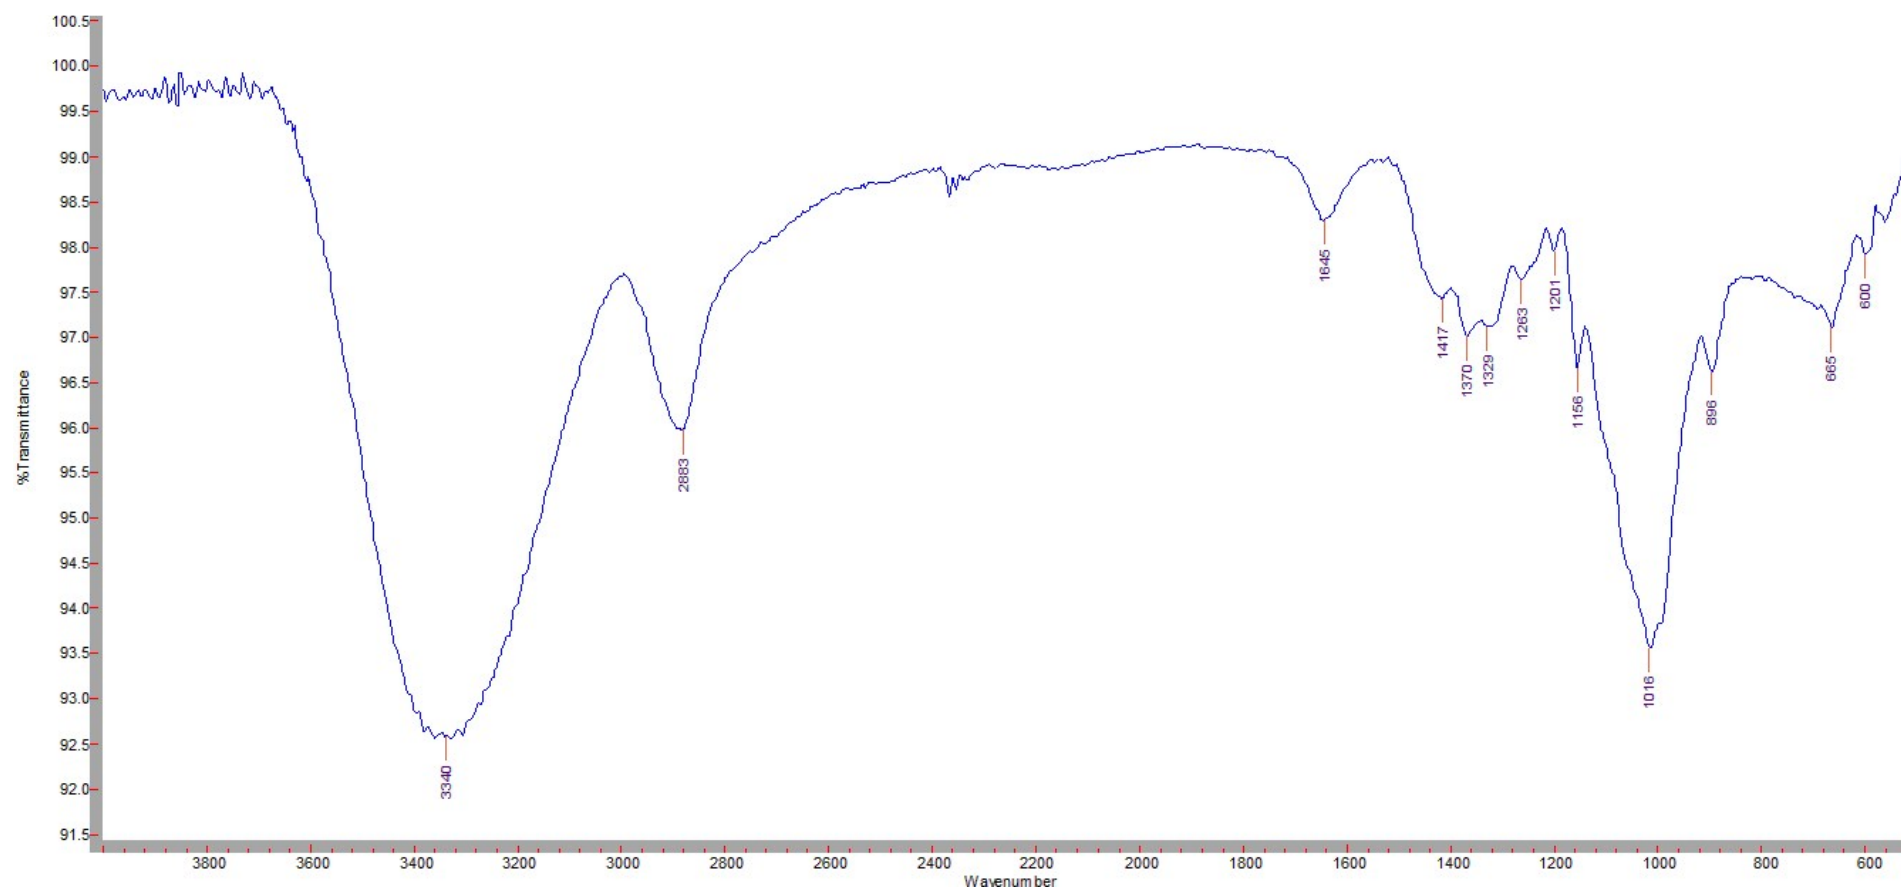

Fig S40: IR of regenerated cellulose after dissolution in  $N_{8881}Lev/DMSO$  at 100 °C

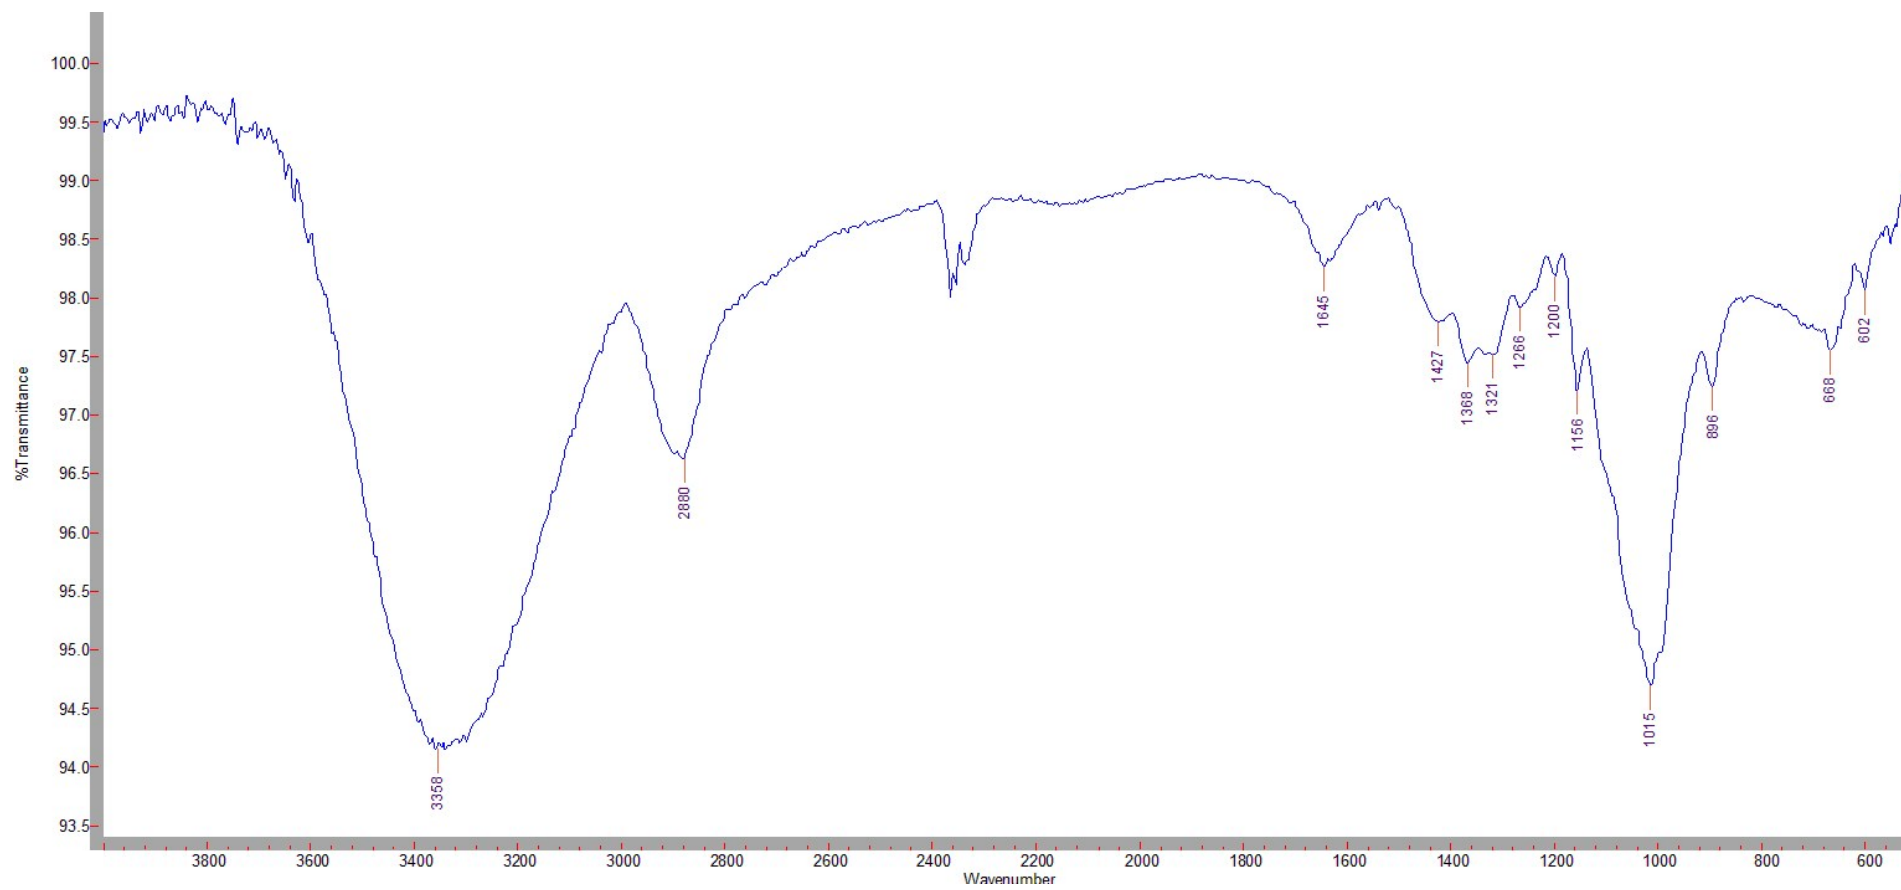

**Fig S41:** IR of regenerated cellulose after dissolution in **P<sub>8881</sub>Lev/DMSO** at 100 °C

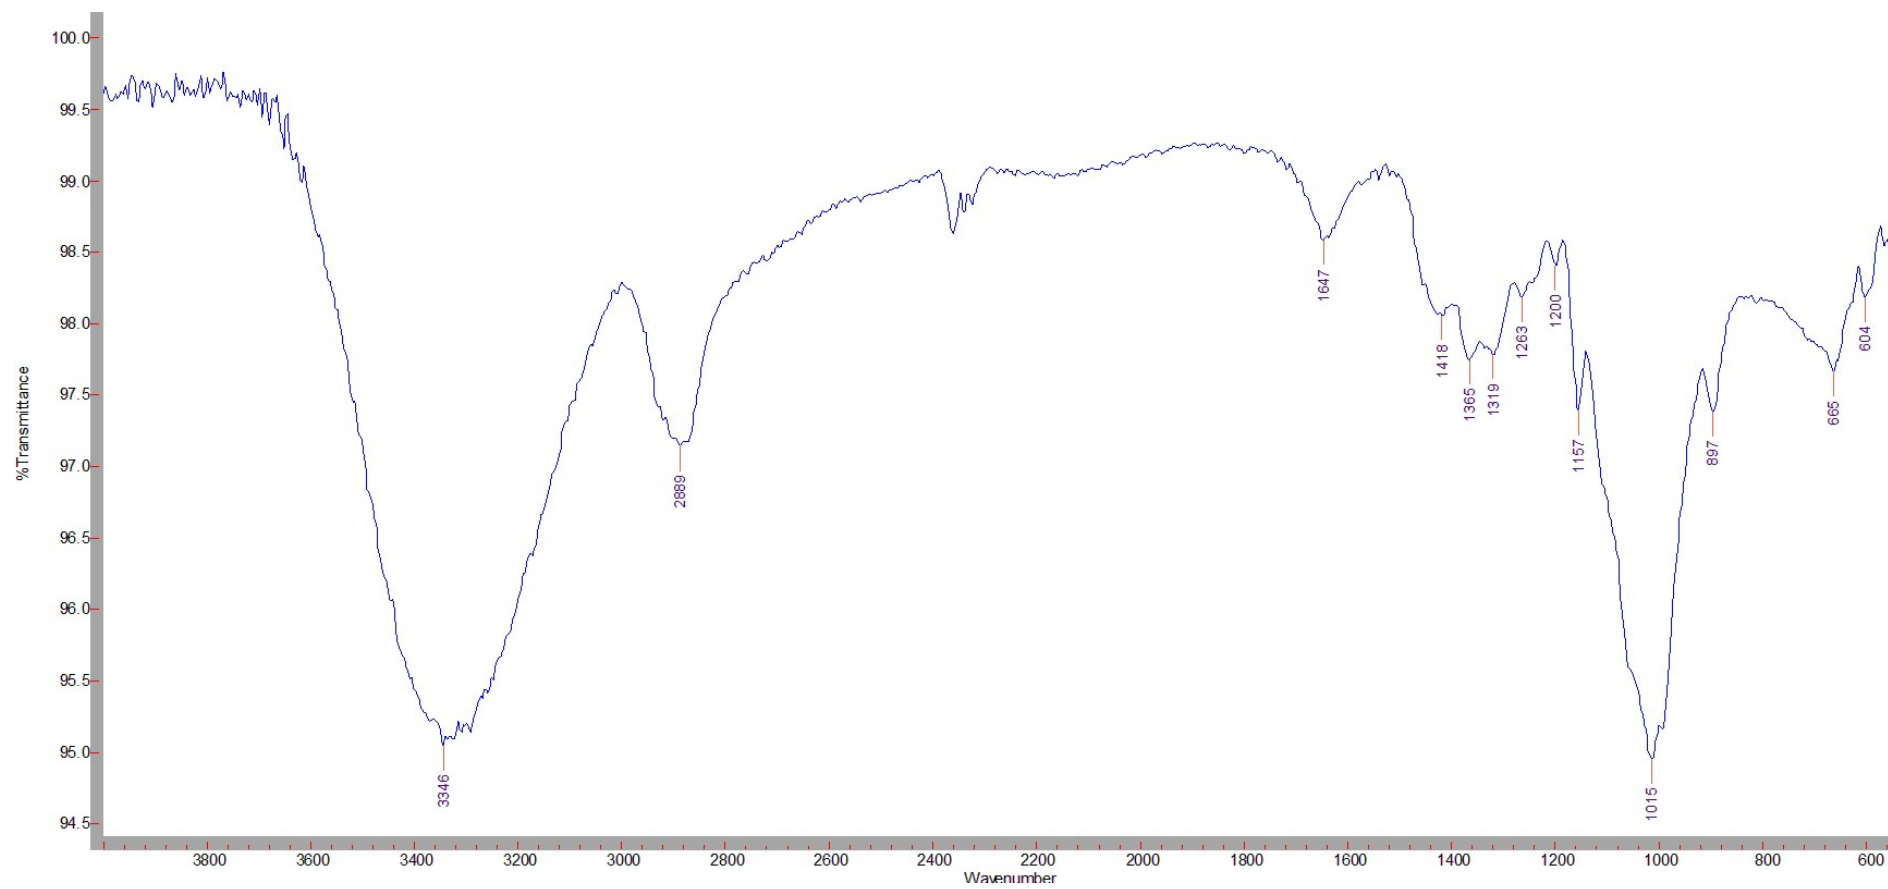

**Fig S42:** Interferograms of MCC and regenerated cellulose from [EMIM][Lev] at various temperatures

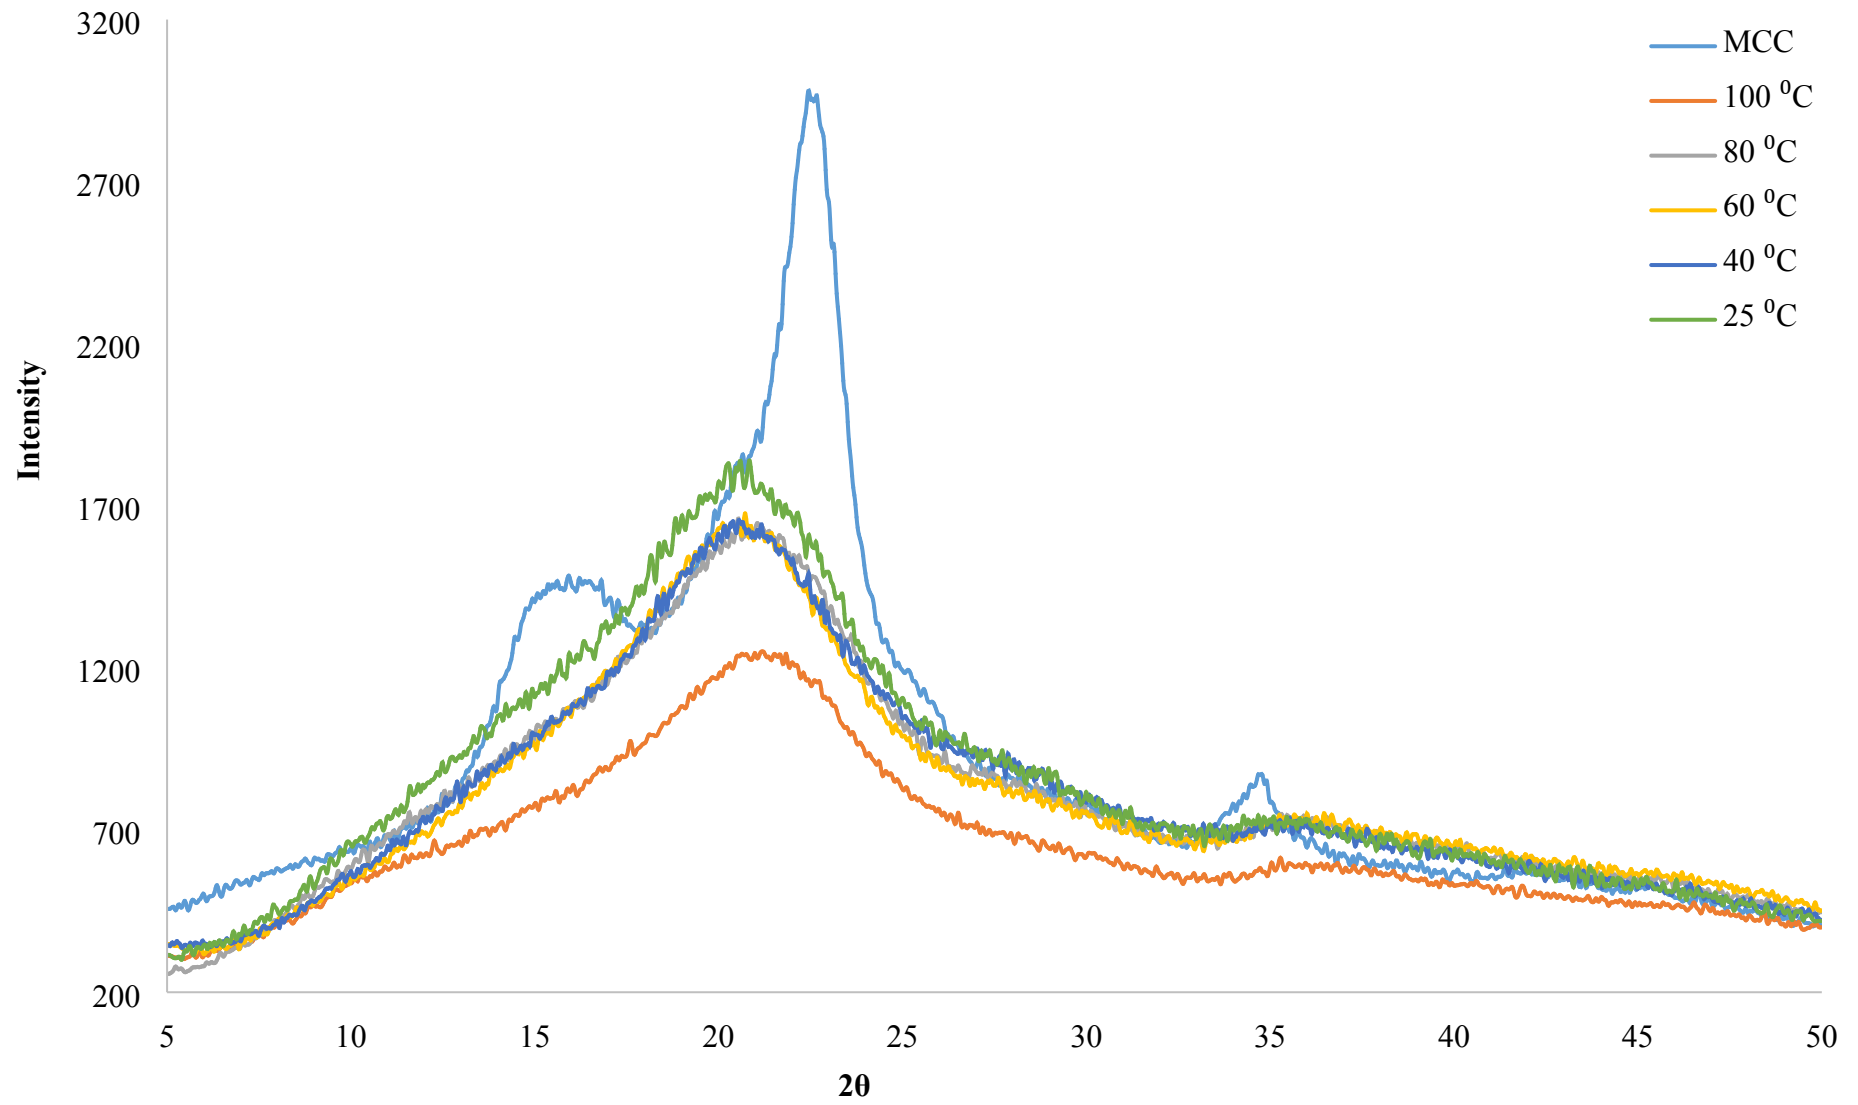

Supplement: c9nj03239h1.pdf [file c9nj03239h1.pdf]
